# Supplementary material for: HERCULES: an integrative deep-learning framework for predicting RNA-binding propensity and mutation effects at single-residue resolution
Source: bioRxiv preprint, doi:10.64898/2026.03.17.712455, version 1 (2026-03-18)
Supplement: Supplementary Table 1 [file 712455_file08.xlsx]

## Sheet: Sheet1
Uniprot_ID	Uniprot_Entry	train	test	HERCULES_global	HERCULES_binary
A0A087X1C5	CP2D7_HUMAN			0.0721137	0
A0A096LP01	SIM26_HUMAN			0.154962	0
A0A0B4J2F0	PIOS1_HUMAN	0		0.142368	0
A0A0C5B5G6	MOTSC_HUMAN			0.0970485	0
A0A0K2S4Q6	CD3CH_HUMAN			0.111716	0
A0A0U1RRE5	NBDY_HUMAN			0.0745741	0
A0A1B0GTW7	CIROP_HUMAN			0.0958511	0
A0A2R8Y7D0	TINCR_HUMAN			0.747798	1
A0A8I5KQE6	RPSA2_HUMAN			0.892309	1
A0AV02	S12A8_HUMAN			0.0615323	0
A0AV96	RBM47_HUMAN	1		0.922688	1
A0AVF1	IFT56_HUMAN			0.797581	1
A0AVI4	TM129_HUMAN			0.0995147	0
A0AVK6	E2F8_HUMAN			0.455158	0
A0AVT1	UBA6_HUMAN			0.835083	1
A0FGR8	ESYT2_HUMAN			0.21336	0
A0FGR9	ESYT3_HUMAN			0.174417	0
A0JLT2	MED19_HUMAN			0.753093	1
A0JNW5	BLT3B_HUMAN			0.189891	0
A0JP26	POTB3_HUMAN			0.306617	0
A0M8Q6	IGLC7_HUMAN			0.682968	1
A0MZ66	SHOT1_HUMAN	0		0.451952	0
A0PJK1	SC5AA_HUMAN			0.0584205	0
A0PJY2	FEZF1_HUMAN			0.897506	1
A0PK00	T120B_HUMAN			0.114279	0
A0PK05	TMM72_HUMAN	0		0.066213	0
A0PK11	CLRN2_HUMAN			0.0643162	0
A1A4S6	RHG10_HUMAN			0.39182	0
A1A4Y4	IRGM_HUMAN			0.115122	0
A1A519	F170A_HUMAN			0.844453	1
A1A5B4	ANO9_HUMAN			0.0882192	0
A1A5C7	S22AN_HUMAN			0.0748863	0
A1E959	ODAM_HUMAN			0.0646265	0
A1KXE4	F168B_HUMAN			0.168327	0
A1KZ92	PXDNL_HUMAN			0.271417	0
A1L0T0	HACL2_HUMAN	0		0.0847683	0
A1L167	U2QL1_HUMAN			0.85554	1
A1L190	SYCE3_HUMAN			0.115101	0
A1L390	PKHG3_HUMAN			0.234407	0
A1L3X0	ELOV7_HUMAN			0.0746152	0
A1L4H1	SRCRL_HUMAN			0.392469	0
A1L4K1	FSD2_HUMAN			0.647784	1
A1X283	SPD2B_HUMAN			0.452938	0
A1XBS5	CBAR1_HUMAN			0.734658	1
A1Z1Q3	MACD2_HUMAN			0.761672	1
A2A288	ZC12D_HUMAN	1		0.664285	1
A2A2Y4	FRMD3_HUMAN			0.415577	0
A2IDD5	CCD78_HUMAN			0.241314	0
A2PYH4	HFM1_HUMAN			0.862566	1
A2RRP1	NBAS_HUMAN			0.67366	1
A2RTX5	SYTC2_HUMAN	1		0.913851	1
A2RU14	TM218_HUMAN			0.0642083	0
A2RU30	TESP1_HUMAN	0		0.176804	0
A2RU49	HYKK_HUMAN			0.392753	0
A2RUB1	MEIOC_HUMAN			0.161311	0
A2RUB6	CCD66_HUMAN			0.660104	1
A2RUC4	TYW5_HUMAN	1		0.712561	1
A2RUH7	MBPHL_HUMAN			0.756997	1
A2VDJ0	T131L_HUMAN			0.102474	0
A2VEC9	SSPO_HUMAN			0.0763443	0
A3KMH1	VWA8_HUMAN	1		0.735075	1
A3KN83	SBNO1_HUMAN	1		0.889764	1
A4D0S4	LAMB4_HUMAN		0	0.130401	0
A4D126	ISPD_HUMAN			0.722343	1
A4D161	F221A_HUMAN			0.881855	1
A4D1B5	GSAP_HUMAN			0.224975	0
A4D1E9	GTPBA_HUMAN	1		0.903369	1
A4D1P6	WDR91_HUMAN			0.848722	1
A4D1S5	RAB19_HUMAN			0.811277	1
A4D1T9	PRS37_HUMAN			0.796907	1
A4D256	CC14C_HUMAN			0.645647	1
A4D2B0	MBLC1_HUMAN			0.254711	0
A4D2B8	PM2P1_HUMAN			0.10951	0
A4GXA9	EME2_HUMAN	0		0.172298	0
A4UGR9	XIRP2_HUMAN			0.163575	0
A5A3E0	POTEF_HUMAN			0.42311	0
A5D8T8	CL18A_HUMAN			0.137974	0
A5D8V6	VP37C_HUMAN			0.748337	1
A5D8V7	ODAD3_HUMAN	0		0.675616	1
A5D8W1	CFA69_HUMAN			0.768042	1
A5LHX3	PSB11_HUMAN			0.430501	0
A5PKW4	PSD1_HUMAN			0.356851	0
A5PLL7	PEDS1_HUMAN	0		0.0902785	0
A5X5Y0	5HT3E_HUMAN		0	0.0602317	0
A5YKK6	CNOT1_HUMAN	1		0.558706	0
A5YM72	CRNS1_HUMAN	0		0.756681	1
A6BM72	MEG11_HUMAN			0.176174	0
A6H8Y1	BDP1_HUMAN			0.243051	0
A6H8Z2	F221B_HUMAN			0.160394	0
A6NC98	CC88B_HUMAN			0.180246	0
A6NCS4	NKX26_HUMAN			0.0902655	0
A6ND01	JUNO_HUMAN			0.0905096	0
A6ND36	FA83G_HUMAN			0.899669	1
A6NDB9	PALM3_HUMAN			0.245245	0
A6NDE4	RBY1B_HUMAN	1		0.942977	1
A6NDG6	PGP_HUMAN	0		0.0719529	0
A6NDV4	TMM8B_HUMAN			0.0715496	0
A6NED2	RCCD1_HUMAN			0.631707	1
A6NEM1	GG6L9_HUMAN			0.344476	0
A6NFA1	TIKI2_HUMAN	0		0.111973	0
A6NFQ2	TCAF2_HUMAN			0.20266	0
A6NFX1	MFS2B_HUMAN	0		0.0989075	0
A6NFY7	SDHF1_HUMAN	0		0.249326	0
A6NGG8	PCARE_HUMAN			0.111755	0
A6NGQ2	OOEP_HUMAN			0.423684	0
A6NGU5	GGT3_HUMAN			0.116029	0
A6NHL2	TBAL3_HUMAN			0.83625	1
A6NHQ2	FBLL1_HUMAN		1	0.92618	1
A6NHR9	SMHD1_HUMAN	1		0.674821	1
A6NHX0	CAST2_HUMAN			0.140778	0
A6NI15	MSGN1_HUMAN	0		0.103315	0
A6NI61	MYMK_HUMAN			0.0888553	0
A6NI73	LIRA5_HUMAN			0.119432	0
A6NIH7	U119B_HUMAN			0.900296	1
A6NIM6	S15A5_HUMAN			0.0815755	0
A6NIX2	WTIP_HUMAN			0.40512	0
A6NJ46	NKX63_HUMAN			0.0742036	0
A6NJ78	MET15_HUMAN	0		0.251082	0
A6NK06	IRG1_HUMAN	0		0.642616	1
A6NK58	LIPT2_HUMAN			0.765248	1
A6NK89	RASFA_HUMAN			0.290069	0
A6NKB5	PCX2_HUMAN			0.0716817	0
A6NKF2	ARI3C_HUMAN		0	0.166203	0
A6NMY6	AXA2L_HUMAN			0.910932	1
A6NMZ7	CO6A6_HUMAN			0.475657	0
A6NNB3	IFM5_HUMAN			0.0688594	0
A6NNM8	TTL13_HUMAN	0		0.901545	1
A6NNN8	S38A8_HUMAN			0.0559214	0
A6NNY8	UBP27_HUMAN			0.702697	1
A6NNZ2	TBB8B_HUMAN			0.901406	1
A6PVC2	TTLL8_HUMAN		0	0.79155	1
A6QL63	ABTB3_HUMAN			0.141993	0
A7E2V4	ZSWM8_HUMAN		1	0.544977	0
A7E2Y1	MYH7B_HUMAN			0.673799	1
A7KAX9	RHG32_HUMAN			0.303327	0
A7MCY6	TBKB1_HUMAN			0.112284	0
A7MD48	SRRM4_HUMAN	1		0.922301	1
A7XYQ1	SOBP_HUMAN			0.847025	1
A8CG34	P121C_HUMAN			0.289462	0
A8K0Z3	WASH1_HUMAN			0.607069	1
A8K2U0	A2ML1_HUMAN			0.172363	0
A8K4G0	CLM7_HUMAN			0.143676	0
A8K7I4	CLCA1_HUMAN			0.359415	0
A8K830	OCAT2_HUMAN			0.088084	0
A8K8P3	SFI1_HUMAN	1		0.86895	1
A8K8V0	ZN785_HUMAN			0.852616	1
A8MPY1	GBRR3_HUMAN	0		0.0685338	0
A8MQ03	CRTP1_HUMAN			0.085636	0
A8MQ27	NEU1B_HUMAN			0.415021	0
A8MT69	CENPX_HUMAN			0.20931	0
A8MTA8	CMI2B_HUMAN	0		0.138947	0
A8MTJ3	GNAT3_HUMAN			0.860743	1
A8MTJ6	FOXI3_HUMAN	0		0.480494	0
A8MTQ0	NOTO_HUMAN			0.0778933	0
A8MTZ0	BBIP1_HUMAN			0.256878	0
A8MU46	SMTL1_HUMAN			0.776585	1
A8MUP2	CSKMT_HUMAN			0.697705	1
A8MV65	VGLL3_HUMAN			0.15213	0
A8MVW5	HECA2_HUMAN			0.21075	0
A8MW92	P20L1_HUMAN			0.710758	1
A8MW95	BECN2_HUMAN			0.187556	0
A8MW99	MEI4_HUMAN	0		0.0802447	0
A8MXD5	GRCR1_HUMAN			0.896039	1
A8MXV4	NUD19_HUMAN	0		0.17574	0
A8MYU2	KCNU1_HUMAN			0.0765165	0
A8MZ59	LEUTX_HUMAN			0.08367	0
A8TX70	CO6A5_HUMAN			0.518014	0
A9QM74	IMA8_HUMAN			0.852859	1
A9UHW6	MI4GD_HUMAN	1		0.728883	1
A9YTQ3	AHRR_HUMAN			0.137806	0
B0I1T2	MYO1G_HUMAN			0.829155	1
B0L3A2	DESPR_HUMAN			0.0769184	0
B0YJ81	HACD1_HUMAN		0	0.0637814	0
B1AK53	ESPN_HUMAN			0.339248	0
B2RPK0	HGB1A_HUMAN			0.934292	1
B2RTY4	MYO9A_HUMAN			0.488101	0
B2RUY7	VWC2L_HUMAN			0.0868472	0
B2RUZ4	SMIM1_HUMAN	0		0.108901	0
B2RXF5	ZBT42_HUMAN			0.798304	1
B2RXH2	KDM4E_HUMAN	0		0.333798	0
B3KU38	IQIP1_HUMAN			0.551917	0
B6A8C7	TARM1_HUMAN			0.151515	0
B7U540	KCJ18_HUMAN			0.0806234	0
B7ZAQ6	GPHRA_HUMAN			0.0713551	0
C0HME6	ALT36_HUMAN			0.0742755	0
C4AMC7	WASH3_HUMAN			0.615611	1
C9JE40	PATL2_HUMAN	1		0.201883	0
C9JLW8	MCRI1_HUMAN	1		0.386531	0
C9JR72	KBTBD_HUMAN			0.661075	1
C9JRZ8	AK1BF_HUMAN			0.162213	0
D3W0D1	KLRF2_HUMAN			0.0695478	0
D6RGH6	MCIN_HUMAN			0.176493	0
E0CX11	STMP1_HUMAN			0.382937	0
F5H094	SO1BT_HUMAN			0.0934416	0
G2XKQ0	SUMO5_HUMAN			0.911718	1
H0YL14	TM250_HUMAN			0.0646769	0
H3BV60	TGR3L_HUMAN	0		0.0644123	0
K7EJ46	SIM22_HUMAN	0		0.0671026	0
K9M1U5	IFNL4_HUMAN	0		0.075832	0
L0R8F8	MIDUO_HUMAN			0.721405	1
M0R2J8	DCDC1_HUMAN			0.814869	1
M5A8F1	SUPYN_HUMAN			0.372228	0
O00115	DNS2A_HUMAN	0		0.0956788	0
O00116	ADAS_HUMAN			0.250615	0
O00124	UBXN8_HUMAN			0.127175	0
O00139	KIF2A_HUMAN	1		0.321661	0
O00141	SGK1_HUMAN			0.74188	1
O00142	KITM_HUMAN			0.169942	0
O00144	FZD9_HUMAN			0.0607073	0
O00148	DX39A_HUMAN	1		0.924265	1
O00151	PDLI1_HUMAN			0.863111	1
O00154	BACH_HUMAN	0		0.194411	0
O00155	GPR25_HUMAN			0.0555236	0
O00159	MYO1C_HUMAN			0.879797	1
O00160	MYO1F_HUMAN			0.84172	1
O00161	SNP23_HUMAN	0		0.34137	0
O00165	HAX1_HUMAN			0.412493	0
O00167	EYA2_HUMAN			0.104797	0
O00168	PLM_HUMAN			0.101798	0
O00170	AIP_HUMAN			0.728037	1
O00175	CCL24_HUMAN			0.166694	0
O00178	GTPB1_HUMAN	1		0.885207	1
O00180	KCNK1_HUMAN			0.0615812	0
O00182	LEG9_HUMAN			0.153677	0
O00186	STXB3_HUMAN			0.759845	1
O00187	MASP2_HUMAN			0.313517	0
O00189	AP4M1_HUMAN			0.207182	0
O00192	ARVC_HUMAN			0.816924	1
O00194	RB27B_HUMAN			0.882965	1
O00198	HRK_HUMAN			0.0660042	0
O00203	AP3B1_HUMAN	0		0.870108	1
O00204	ST2B1_HUMAN			0.350115	0
O00206	TLR4_HUMAN			0.124758	0
O00212	RHOD_HUMAN			0.881331	1
O00213	APBB1_HUMAN			0.603042	1
O00214	LEG8_HUMAN			0.595336	1
O00217	NDUS8_HUMAN	0		0.0988974	0
O00219	HYAS3_HUMAN			0.0670266	0
O00220	TR10A_HUMAN		0	0.113379	0
O00221	IKBE_HUMAN		0	0.155964	0
O00222	GRM8_HUMAN			0.0753911	0
O00230	CORT_HUMAN			0.0626081	0
O00231	PSD11_HUMAN	0		0.431337	0
O00232	PSD12_HUMAN			0.761523	1
O00233	PSMD9_HUMAN	1		0.902836	1
O00237	RN103_HUMAN			0.0879025	0
O00238	BMR1B_HUMAN			0.130342	0
O00241	SIRB1_HUMAN			0.275681	0
O00244	ATOX1_HUMAN		1	0.760961	1
O00253	AGRP_HUMAN	0		0.0679783	0
O00254	PAR3_HUMAN	0		0.0563744	0
O00255	MEN1_HUMAN	1		0.69304	1
O00257	CBX4_HUMAN			0.580578	1
O00258	GET1_HUMAN			0.125397	0
O00264	PGRC1_HUMAN			0.604947	1
O00267	SPT5H_HUMAN	1		0.926968	1
O00268	TAF4_HUMAN	1		0.812644	1
O00270	GPR31_HUMAN			0.0557046	0
O00273	DFFA_HUMAN			0.334634	0
O00287	RFXAP_HUMAN			0.799277	1
O00291	HIP1_HUMAN	1		0.120353	0
O00292	LFTY2_HUMAN	0		0.0758085	0
O00294	TULP1_HUMAN			0.921916	1
O00299	CLIC1_HUMAN	1		0.835261	1
O00300	TR11B_HUMAN			0.200443	0
O00303	EIF3F_HUMAN	1		0.385336	0
O00305	CACB4_HUMAN			0.868957	1
O00308	WWP2_HUMAN			0.807365	1
O00311	CDC7_HUMAN			0.33303	0
O00321	ETV2_HUMAN	0		0.116703	0
O00322	UPK1A_HUMAN			0.0644638	0
O00327	BMAL1_HUMAN			0.335895	0
O00329	PK3CD_HUMAN			0.4286	0
O00330	ODPX_HUMAN			0.912848	1
O00337	S28A1_HUMAN		0	0.0603381	0
O00338	ST1C2_HUMAN			0.74654	1
O00339	MATN2_HUMAN			0.234324	0
O00341	EAA5_HUMAN			0.109925	0
O00358	FOXE1_HUMAN			0.263944	0
O00370	LORF2_HUMAN			0.867008	1
O00391	QSOX1_HUMAN			0.495575	0
O00399	DCTN6_HUMAN			0.380442	0
O00400	ACATN_HUMAN	0		0.0691029	0
O00401	WASL_HUMAN		0	0.917242	1
O00408	PDE2A_HUMAN			0.354815	0
O00409	FOXN3_HUMAN			0.398481	0
O00410	IPO5_HUMAN			0.755712	1
O00411	RPOM_HUMAN		1	0.616626	1
O00418	EF2K_HUMAN	1		0.842785	1
O00421	CCRL2_HUMAN			0.0613982	0
O00422	SAP18_HUMAN	1		0.923529	1
O00423	EMAL1_HUMAN			0.89715	1
O00425	IF2B3_HUMAN	1		0.922954	1
O00429	DNM1L_HUMAN			0.833492	1
O00442	RTCA_HUMAN	1		0.87713	1
O00443	P3C2A_HUMAN			0.416585	0
O00444	PLK4_HUMAN			0.646245	1
O00445	SYT5_HUMAN			0.268906	0
O00451	GFRA2_HUMAN			0.221715	0
O00453	LST1_HUMAN			0.0962872	0
O00459	P85B_HUMAN	0		0.714229	1
O00461	GOLI4_HUMAN	0		0.615829	1
O00462	MANBA_HUMAN			0.0992538	0
O00463	TRAF5_HUMAN			0.461454	0
O00468	AGRIN_HUMAN			0.15902	0
O00469	PLOD2_HUMAN			0.160165	0
O00470	MEIS1_HUMAN			0.130125	0
O00471	EXOC5_HUMAN			0.119843	0
O00472	ELL2_HUMAN	0		0.714835	1
O00476	NPT4_HUMAN			0.104127	0
O00478	BT3A3_HUMAN			0.171242	0
O00481	BT3A1_HUMAN			0.264347	0
O00482	NR5A2_HUMAN			0.772059	1
O00483	CXFA4_HUMAN	1		0.490628	0
O00487	PSDE_HUMAN			0.667593	1
O00488	ZN593_HUMAN			0.923164	1
O00499	BIN1_HUMAN		1	0.561913	0
O00501	CLD5_HUMAN			0.058404	0
O00505	IMA4_HUMAN			0.848348	1
O00506	STK25_HUMAN			0.503751	0
O00507	USP9Y_HUMAN			0.437829	0
O00512	BCL9_HUMAN			0.809957	1
O00519	FAAH1_HUMAN			0.262479	0
O00522	KRIT1_HUMAN			0.654197	1
O00526	UPK2_HUMAN	0		0.0994687	0
O00533	NCHL1_HUMAN			0.311603	0
O00541	PESC_HUMAN		1	0.928354	1
O00548	DLL1_HUMAN			0.185954	0
O00555	CAC1A_HUMAN			0.0806173	0
O00559	RCAS1_HUMAN		0	0.865486	1
O00560	SDCB1_HUMAN	0		0.858833	1
O00562	PITM1_HUMAN			0.492704	0
O00566	MPP10_HUMAN	1		0.930013	1
O00567	NOP56_HUMAN	1		0.916998	1
O00571	DDX3X_HUMAN		1	0.92958	1
O00574	CXCR6_HUMAN			0.0581669	0
O00584	RNT2_HUMAN		1	0.13495	0
O00585	CCL21_HUMAN			0.130936	0
O00587	MFNG_HUMAN			0.113063	0
O00590	ACKR2_HUMAN			0.0573181	0
O00591	GBRP_HUMAN			0.0666364	0
O00592	PODXL_HUMAN			0.0871162	0
O00602	FCN1_HUMAN			0.187801	0
O00622	CCN1_HUMAN			0.128552	0
O00623	PEX12_HUMAN			0.135139	0
O00624	NPT3_HUMAN			0.133311	0
O00625	PIR_HUMAN			0.550831	0
O00626	CCL22_HUMAN			0.101453	0
O00628	PEX7_HUMAN			0.820782	1
O00629	IMA3_HUMAN			0.838164	1
O00631	SARCO_HUMAN			0.0619279	0
O00635	TRI38_HUMAN			0.865665	1
O00712	NFIB_HUMAN			0.36516	0
O00716	E2F3_HUMAN			0.267656	0
O00743	PPP6_HUMAN			0.885436	1
O00744	WN10B_HUMAN			0.161249	0
O00746	NDKD_HUMAN			0.27018	0
O00748	EST2_HUMAN			0.069042	0
O00750	P3C2B_HUMAN			0.390299	0
O00754	MA2B1_HUMAN	0		0.174634	0
O00755	WNT7A_HUMAN			0.217952	0
O00757	F16P2_HUMAN			0.35308	0
O00762	UBE2C_HUMAN	0		0.656674	1
O00763	ACACB_HUMAN			0.627959	1
O00764	PDXK_HUMAN			0.387461	0
O00767	SCD_HUMAN		0	0.388636	0
O14490	DLGP1_HUMAN			0.132219	0
O14492	SH2B2_HUMAN			0.479912	0
O14493	CLD4_HUMAN			0.060196	0
O14494	PLPP1_HUMAN	0		0.0711576	0
O14495	PLPP3_HUMAN			0.0734191	0
O14497	ARI1A_HUMAN	1		0.897781	1
O14503	BHE40_HUMAN			0.565729	1
O14508	SOCS2_HUMAN			0.820613	1
O14511	NRG2_HUMAN			0.332916	0
O14512	SOCS7_HUMAN			0.186646	0
O14513	NCKP5_HUMAN			0.2833	0
O14514	AGRB1_HUMAN			0.119774	0
O14519	CDKA1_HUMAN			0.330984	0
O14520	AQP7_HUMAN			0.0780348	0
O14521	DHSD_HUMAN	0		0.0629216	0
O14522	PTPRT_HUMAN			0.309918	0
O14523	C2C2L_HUMAN			0.0858326	0
O14524	NEMP1_HUMAN	0		0.0917374	0
O14525	ASTN1_HUMAN	0		0.121492	0
O14526	FCHO1_HUMAN			0.230651	0
O14529	CUX2_HUMAN			0.206696	0
O14530	TXND9_HUMAN	1		0.926137	1
O14531	DPYL4_HUMAN			0.439001	0
O14543	SOCS3_HUMAN			0.287523	0
O14544	SOCS6_HUMAN			0.157784	0
O14548	CO72L_HUMAN	0		0.174709	0
O14556	G3PT_HUMAN			0.915939	1
O14558	HSPB6_HUMAN			0.231894	0
O14559	RHG33_HUMAN			0.238871	0
O14561	ACPM_HUMAN	0		0.110937	0
O14569	C56D2_HUMAN			0.0592371	0
O14576	DC1I1_HUMAN			0.898866	1
O14578	CTRO_HUMAN			0.450235	0
O14579	COPE_HUMAN	1		0.8231	1
O14593	RFXK_HUMAN			0.138739	0
O14594	NCAN_HUMAN			0.197749	0
O14595	CTDS2_HUMAN			0.0866874	0
O14607	UTY_HUMAN			0.445061	0
O14610	GBGT2_HUMAN			0.565241	1
O14613	BORG1_HUMAN			0.140944	0
O14617	AP3D1_HUMAN	1		0.879789	1
O14618	CCS_HUMAN	0		0.432139	0
O14625	CXL11_HUMAN			0.48178	0
O14627	CDX4_HUMAN			0.12953	0
O14628	ZN195_HUMAN			0.917422	1
O14633	LCE2B_HUMAN			0.0800235	0
O14638	ENPP3_HUMAN			0.0929372	0
O14639	ABLM1_HUMAN			0.47807	0
O14640	DVL1_HUMAN			0.78731	1
O14641	DVL2_HUMAN			0.609761	1
O14645	IDLC_HUMAN			0.450066	0
O14646	CHD1_HUMAN			0.906088	1
O14647	CHD2_HUMAN	1		0.912953	1
O14649	KCNK3_HUMAN			0.0651047	0
O14653	GOSR2_HUMAN			0.211454	0
O14654	IRS4_HUMAN			0.750023	1
O14656	TOR1A_HUMAN			0.438665	0
O14657	TOR1B_HUMAN		0	0.507804	0
O14662	STX16_HUMAN	0		0.12408	0
O14669	TMG2_HUMAN			0.0738648	0
O14672	ADA10_HUMAN		0	0.263228	0
O14678	ABCD4_HUMAN			0.152067	0
O14681	EI24_HUMAN			0.0975559	0
O14682	ENC1_HUMAN			0.469183	0
O14684	PTGES_HUMAN			0.101212	0
O14686	KMT2D_HUMAN			0.542979	0
O14713	ITBP1_HUMAN			0.67329	1
O14717	TRDMT_HUMAN	1		0.909438	1
O14727	APAF_HUMAN			0.872203	1
O14730	RIOK3_HUMAN	1		0.867331	1
O14732	IMPA2_HUMAN	0		0.0933063	0
O14733	MP2K7_HUMAN	0		0.547546	0
O14734	ACOT8_HUMAN			0.543408	0
O14735	CDIPT_HUMAN			0.0580525	0
O14737	PDCD5_HUMAN			0.884276	1
O14744	ANM5_HUMAN		1	0.679586	1
O14745	NHRF1_HUMAN	1		0.918518	1
O14746	TERT_HUMAN	1		0.673461	1
O14756	H17B6_HUMAN			0.131811	0
O14757	CHK1_HUMAN		0	0.796671	1
O14763	TR10B_HUMAN			0.108337	0
O14764	GBRD_HUMAN			0.0651214	0
O14770	MEIS2_HUMAN			0.150596	0
O14771	ZN213_HUMAN			0.877727	1
O14772	FPGT_HUMAN			0.351656	0
O14773	TPP1_HUMAN			0.0895063	0
O14775	GNB5_HUMAN			0.90968	1
O14776	TCRG1_HUMAN	1		0.917061	1
O14777	NDC80_HUMAN	1		0.549368	0
O14782	KIF3C_HUMAN			0.413904	0
O14786	NRP1_HUMAN	0		0.0792786	0
O14787	TNPO2_HUMAN			0.803226	1
O14788	TNF11_HUMAN			0.0904456	0
O14791	APOL1_HUMAN			0.0670173	0
O14792	HS3S1_HUMAN			0.322816	0
O14793	GDF8_HUMAN			0.215934	0
O14795	UN13B_HUMAN			0.145892	0
O14796	SH21B_HUMAN			0.859107	1
O14798	TR10C_HUMAN			0.0886259	0
O14802	RPC1_HUMAN	0		0.887566	1
O14804	TAAR5_HUMAN			0.0558639	0
O14807	RASM_HUMAN			0.883956	1
O14810	CPLX1_HUMAN			0.912569	1
O14813	PHX2A_HUMAN			0.0842107	0
O14815	CAN9_HUMAN			0.567449	1
O14817	TSN4_HUMAN			0.0587993	0
O14818	PSA7_HUMAN	1		0.892712	1
O14827	RGRF2_HUMAN			0.144733	0
O14828	SCAM3_HUMAN	1		0.089222	0
O14829	PPE1_HUMAN			0.274095	0
O14830	PPE2_HUMAN			0.305939	0
O14832	PAHX_HUMAN			0.862347	1
O14836	TR13B_HUMAN			0.0771898	0
O14842	FFAR1_HUMAN			0.0546899	0
O14843	FFAR3_HUMAN			0.0578516	0
O14862	AIM2_HUMAN			0.883512	1
O14863	ZNT4_HUMAN			0.0711892	0
O14867	BACH1_HUMAN			0.134879	0
O14874	BCKD_HUMAN			0.832538	1
O14879	IFIT3_HUMAN	1		0.717837	1
O14880	MGST3_HUMAN			0.196139	0
O14893	GEMI2_HUMAN	1		0.364546	0
O14894	T4S5_HUMAN			0.0687499	0
O14896	IRF6_HUMAN			0.284971	0
O14901	KLF11_HUMAN			0.859362	1
O14904	WNT9A_HUMAN			0.225695	0
O14905	WNT9B_HUMAN			0.134279	0
O14907	TX1B3_HUMAN			0.791683	1
O14908	GIPC1_HUMAN			0.889388	1
O14910	LIN7A_HUMAN			0.89359	1
O14917	PCD17_HUMAN			0.402005	0
O14920	IKKB_HUMAN	0		0.196916	0
O14924	RGS12_HUMAN			0.797817	1
O14925	TIM23_HUMAN			0.156916	0
O14926	FSCN2_HUMAN			0.711739	1
O14929	HAT1_HUMAN	1		0.894855	1
O14931	NCTR3_HUMAN			0.11571	0
O14933	UB2L6_HUMAN			0.635752	1
O14936	CSKP_HUMAN			0.503292	0
O14939	PLD2_HUMAN			0.453928	0
O14944	EREG_HUMAN			0.113278	0
O14948	TFEC_HUMAN			0.447734	0
O14949	QCR8_HUMAN		0	0.121697	0
O14950	ML12B_HUMAN			0.641061	1
O14957	QCR10_HUMAN			0.117994	0
O14958	CASQ2_HUMAN			0.742102	1
O14960	LECT2_HUMAN			0.416438	0
O14964	HGS_HUMAN			0.803134	1
O14965	AURKA_HUMAN			0.40566	0
O14966	RAB7L_HUMAN			0.780783	1
O14967	CLGN_HUMAN			0.773444	1
O14972	VP26C_HUMAN	0		0.313895	0
O14974	MYPT1_HUMAN	1		0.700776	1
O14975	S27A2_HUMAN			0.178153	0
O14976	GAK_HUMAN			0.433807	0
O14977	AZIN1_HUMAN			0.304484	0
O14978	ZN263_HUMAN			0.857413	1
O14979	HNRDL_HUMAN	1		0.935515	1
O14980	XPO1_HUMAN	1		0.291363	0
O14981	BTAF1_HUMAN	1		0.871011	1
O14983	AT2A1_HUMAN			0.128127	0
O14986	PI51B_HUMAN			0.429438	0
O14994	SYN3_HUMAN			0.481703	0
O15013	ARHGA_HUMAN			0.459367	0
O15014	ZN609_HUMAN			0.869054	1
O15015	ZN646_HUMAN			0.886436	1
O15018	PDZD2_HUMAN			0.773362	1
O15020	SPTN2_HUMAN	1		0.445264	0
O15021	MAST4_HUMAN			0.251931	0
O15027	SC16A_HUMAN	1		0.601009	1
O15031	PLXB2_HUMAN			0.125173	0
O15033	AREL1_HUMAN			0.241689	0
O15040	TCPR2_HUMAN			0.266936	0
O15041	SEM3E_HUMAN			0.58876	1
O15042	SR140_HUMAN	1		0.932607	1
O15047	SET1A_HUMAN	1		0.871193	1
O15049	N4BP3_HUMAN			0.278786	0
O15054	KDM6B_HUMAN			0.608657	1
O15055	PER2_HUMAN			0.262734	0
O15056	SYNJ2_HUMAN			0.694456	1
O15060	ZBT39_HUMAN			0.884363	1
O15061	SYNEM_HUMAN			0.397241	0
O15062	ZBTB5_HUMAN			0.825255	1
O15066	KIF3B_HUMAN			0.689113	1
O15067	PUR4_HUMAN	1		0.451851	0
O15068	MCF2L_HUMAN			0.456435	0
O15072	ATS3_HUMAN			0.298741	0
O15075	DCLK1_HUMAN			0.684971	1
O15078	CE290_HUMAN			0.735849	1
O15079	SNPH_HUMAN			0.103512	0
O15083	ERC2_HUMAN			0.658881	1
O15084	ANR28_HUMAN			0.224882	0
O15085	ARHGB_HUMAN			0.201295	0
O15091	MRPP3_HUMAN	1		0.861629	1
O15105	SMAD7_HUMAN	1		0.306035	0
O15111	IKKA_HUMAN			0.208418	0
O15116	LSM1_HUMAN	1		0.925327	1
O15117	FYB1_HUMAN			0.924962	1
O15118	NPC1_HUMAN			0.0627444	0
O15119	TBX3_HUMAN			0.456442	0
O15120	PLCB_HUMAN			0.0632786	0
O15121	DEGS1_HUMAN			0.35313	0
O15123	ANGP2_HUMAN			0.0889092	0
O15126	SCAM1_HUMAN			0.123929	0
O15127	SCAM2_HUMAN			0.0807937	0
O15130	NPFF_HUMAN			0.0687874	0
O15131	IMA6_HUMAN			0.877315	1
O15143	ARC1B_HUMAN	1		0.880315	1
O15144	ARPC2_HUMAN			0.845513	1
O15145	ARPC3_HUMAN	1		0.728222	1
O15146	MUSK_HUMAN			0.0987049	0
O15151	MDM4_HUMAN			0.458567	0
O15155	BET1_HUMAN			0.693245	1
O15156	ZBT7B_HUMAN			0.889965	1
O15160	RPAC1_HUMAN	1		0.883848	1
O15162	PLS1_HUMAN			0.359672	0
O15164	TIF1A_HUMAN	1		0.429922	0
O15165	LRAD4_HUMAN			0.102486	0
O15169	AXIN1_HUMAN			0.755472	1
O15173	PGRC2_HUMAN	1		0.772351	1
O15178	TBXT_HUMAN			0.417662	0
O15182	CETN3_HUMAN			0.116177	0
O15194	CTDSL_HUMAN			0.0997341	0
O15195	VILL_HUMAN			0.744871	1
O15197	EPHB6_HUMAN			0.087487	0
O15198	SMAD9_HUMAN		1	0.326983	0
O15204	ADEC1_HUMAN	0		0.167621	0
O15205	UBD_HUMAN			0.61849	1
O15209	ZBT22_HUMAN			0.854373	1
O15211	RGL2_HUMAN			0.152923	0
O15212	PFD6_HUMAN	1		0.771429	1
O15213	WDR46_HUMAN	1		0.922666	1
O15217	GSTA4_HUMAN			0.542266	0
O15218	ACKR5_HUMAN			0.057968	0
O15226	NKRF_HUMAN	1		0.915973	1
O15228	GNPAT_HUMAN			0.549307	0
O15229	KMO_HUMAN			0.265877	0
O15230	LAMA5_HUMAN			0.120526	0
O15231	ZN185_HUMAN			0.471536	0
O15232	MATN3_HUMAN			0.179233	0
O15234	CASC3_HUMAN	1		0.862029	1
O15239	NDUA1_HUMAN			0.425458	0
O15240	VGF_HUMAN			0.126142	0
O15243	OBRG_HUMAN			0.0724273	0
O15244	S22A2_HUMAN			0.0778054	0
O15245	S22A1_HUMAN			0.0721352	0
O15247	CLIC2_HUMAN			0.623463	1
O15254	ACOX3_HUMAN			0.450131	0
O15258	RER1_HUMAN			0.194152	0
O15259	NPHP1_HUMAN			0.727952	1
O15260	SURF4_HUMAN	0		0.075117	0
O15263	DFB4A_HUMAN	0		0.0830973	0
O15264	MK13_HUMAN			0.664807	1
O15265	ATX7_HUMAN			0.679575	1
O15266	SHOX_HUMAN			0.104468	0
O15269	SPTC1_HUMAN	0		0.161703	0
O15270	SPTC2_HUMAN	1		0.231659	0
O15273	TELT_HUMAN			0.0876818	0
O15287	FANCG_HUMAN			0.18148	0
O15294	OGT1_HUMAN			0.513408	0
O15296	LX15B_HUMAN			0.31932	0
O15297	PPM1D_HUMAN			0.425182	0
O15303	GRM6_HUMAN			0.0736008	0
O15304	SIVA_HUMAN			0.500848	0
O15305	PMM2_HUMAN	0		0.157831	0
O15315	RA51B_HUMAN			0.580982	1
O15318	RPC7_HUMAN			0.931941	1
O15327	INP4B_HUMAN			0.338269	0
O15342	VA0E1_HUMAN			0.0610111	0
O15344	TRI18_HUMAN			0.717438	1
O15347	HMGB3_HUMAN			0.935726	1
O15350	P73_HUMAN			0.452694	0
O15353	FOXN1_HUMAN			0.0989479	0
O15354	GPR37_HUMAN			0.0618746	0
O15355	PPM1G_HUMAN		1	0.598918	1
O15357	SHIP2_HUMAN			0.387992	0
O15360	FANCA_HUMAN			0.121176	0
O15370	SOX12_HUMAN			0.806435	1
O15371	EIF3D_HUMAN		1	0.925062	1
O15372	EIF3H_HUMAN	1		0.88622	1
O15374	MOT5_HUMAN			0.144885	0
O15379	HDAC3_HUMAN			0.697179	1
O15381	NVL_HUMAN	1		0.799696	1
O15382	BCAT2_HUMAN	0		0.470947	0
O15389	SIGL5_HUMAN			0.230974	0
O15391	TYY2_HUMAN			0.92152	1
O15392	BIRC5_HUMAN	0		0.423708	0
O15393	TMPS2_HUMAN			0.766525	1
O15394	NCAM2_HUMAN			0.62294	1
O15397	IPO8_HUMAN			0.667089	1
O15399	NMDE4_HUMAN			0.0742133	0
O15400	STX7_HUMAN	1		0.52359	0
O15405	TOX3_HUMAN			0.394074	0
O15409	FOXP2_HUMAN			0.495096	0
O15417	TNC18_HUMAN			0.702273	1
O15427	MOT4_HUMAN	1		0.256325	0
O15431	COPT1_HUMAN	0		0.0762636	0
O15432	COPT2_HUMAN			0.0780207	0
O15438	MRP3_HUMAN			0.072711	0
O15439	MRP4_HUMAN			0.0920499	0
O15440	MRP5_HUMAN			0.097846	0
O15444	CCL25_HUMAN			0.124253	0
O15446	RPA34_HUMAN	1		0.876164	1
O15455	TLR3_HUMAN		1	0.227424	0
O15457	MSH4_HUMAN			0.155863	0
O15460	P4HA2_HUMAN	0		0.316093	0
O15466	SIA8E_HUMAN	0		0.0866725	0
O15467	CCL16_HUMAN			0.109011	0
O15479	MAGB2_HUMAN			0.822579	1
O15481	MAGB4_HUMAN			0.58499	1
O15484	CAN5_HUMAN			0.74752	1
O15488	GLYG2_HUMAN			0.417023	0
O15492	RGS16_HUMAN			0.172997	0
O15496	PA2GX_HUMAN			0.107086	0
O15498	YKT6_HUMAN		0	0.503249	0
O15499	GSC2_HUMAN			0.0764856	0
O15503	INSI1_HUMAN			0.0657766	0
O15504	NUP42_HUMAN	1		0.896502	1
O15511	ARPC5_HUMAN			0.908766	1
O15514	RPB4_HUMAN	1		0.40503	0
O15516	CLOCK_HUMAN			0.524176	0
O15519	CFLAR_HUMAN			0.617704	1
O15520	FGF10_HUMAN			0.101912	0
O15522	NKX28_HUMAN			0.0712911	0
O15523	DDX3Y_HUMAN			0.930098	1
O15524	SOCS1_HUMAN			0.479859	0
O15525	MAFG_HUMAN			0.810763	1
O15527	OGG1_HUMAN			0.895615	1
O15528	CP27B_HUMAN			0.0744782	0
O15529	GPR42_HUMAN			0.0579121	0
O15530	PDPK1_HUMAN			0.759046	1
O15533	TPSN_HUMAN			0.0735485	0
O15534	PER1_HUMAN			0.207562	0
O15535	ZSC9_HUMAN			0.832345	1
O15537	XLRS1_HUMAN			0.110253	0
O15540	FABP7_HUMAN			0.911642	1
O15541	R113A_HUMAN		1	0.908552	1
O15547	P2RX6_HUMAN			0.0724381	0
O15550	KDM6A_HUMAN			0.415993	0
O15551	CLD3_HUMAN			0.0608782	0
O15552	FFAR2_HUMAN			0.059016	0
O15553	MEFV_HUMAN			0.47895	0
O15554	KCNN4_HUMAN			0.0927972	0
O42043	ENK18_HUMAN			0.0802666	0
O43143	DHX15_HUMAN	1		0.919053	1
O43147	SGSM2_HUMAN	0		0.165699	0
O43148	MCES_HUMAN	1		0.931905	1
O43149	ZZEF1_HUMAN			0.429372	0
O43150	ASAP2_HUMAN			0.226082	0
O43151	TET3_HUMAN			0.788265	1
O43155	FLRT2_HUMAN			0.203091	0
O43156	TTI1_HUMAN			0.518974	0
O43157	PLXB1_HUMAN			0.122367	0
O43159	RRP8_HUMAN	1		0.917639	1
O43164	PJA2_HUMAN			0.16898	0
O43166	SI1L1_HUMAN			0.577838	1
O43167	ZBT24_HUMAN			0.919445	1
O43169	CYB5B_HUMAN	1		0.244723	0
O43172	PRP4_HUMAN	1		0.924288	1
O43173	SIA8C_HUMAN			0.0965266	0
O43174	CP26A_HUMAN			0.0777605	0
O43175	SERA_HUMAN	1		0.758731	1
O43181	NDUS4_HUMAN		0	0.924959	1
O43182	RHG06_HUMAN			0.261165	0
O43184	ADA12_HUMAN			0.191255	0
O43186	CRX_HUMAN			0.114431	0
O43187	IRAK2_HUMAN			0.146448	0
O43189	PHF1_HUMAN			0.436518	0
O43193	MTLR_HUMAN			0.0609348	0
O43194	GPR39_HUMAN			0.0637186	0
O43196	MSH5_HUMAN			0.215757	0
O43236	SEPT4_HUMAN			0.787488	1
O43237	DC1L2_HUMAN	0		0.527192	0
O43240	KLK10_HUMAN			0.859379	1
O43242	PSMD3_HUMAN	1		0.808192	1
O43248	HXC11_HUMAN			0.0850663	0
O43251	RFOX2_HUMAN			0.920936	1
O43252	PAPS1_HUMAN			0.584322	1
O43255	SIAH2_HUMAN			0.278215	0
O43257	ZNHI1_HUMAN			0.896059	1
O43264	ZW10_HUMAN			0.112914	0
O43272	PROD_HUMAN			0.71023	1
O43278	SPIT1_HUMAN			0.174044	0
O43280	TREA_HUMAN	0		0.0992184	0
O43281	EFS_HUMAN			0.274931	0
O43283	M3K13_HUMAN			0.161896	0
O43286	B4GT5_HUMAN			0.143213	0
O43290	SNUT1_HUMAN	1		0.932906	1
O43291	SPIT2_HUMAN			0.115349	0
O43292	GPAA1_HUMAN			0.0612142	0
O43293	DAPK3_HUMAN			0.496709	0
O43294	TGFI1_HUMAN			0.577646	1
O43295	SRGP3_HUMAN			0.181234	0
O43296	ZN264_HUMAN			0.905186	1
O43298	ZBT43_HUMAN			0.914759	1
O43299	AP5Z1_HUMAN	0		0.196402	0
O43300	LRRT2_HUMAN			0.229914	0
O43303	CP110_HUMAN			0.406247	0
O43306	ADCY6_HUMAN	0		0.0740889	0
O43307	ARHG9_HUMAN			0.599885	1
O43309	ZSC12_HUMAN			0.923393	1
O43310	CTIF_HUMAN		1	0.549403	0
O43312	MTSS1_HUMAN			0.177698	0
O43313	ATMIN_HUMAN			0.835975	1
O43314	VIP2_HUMAN			0.866393	1
O43315	AQP9_HUMAN			0.0691704	0
O43316	PAX4_HUMAN			0.130694	0
O43318	M3K7_HUMAN	0		0.258891	0
O43320	FGF16_HUMAN			0.599973	1
O43323	DHH_HUMAN	0		0.138059	0
O43324	MCA3_HUMAN		1	0.352207	0
O43353	RIPK2_HUMAN		0	0.109406	0
O43364	HXA2_HUMAN			0.0770118	0
O43365	HXA3_HUMAN			0.0908829	0
O43374	RASL2_HUMAN			0.694042	1
O43379	WDR62_HUMAN			0.670227	1
O43390	HNRPR_HUMAN	1		0.934589	1
O43395	PRPF3_HUMAN		1	0.933248	1
O43396	TXNL1_HUMAN	1		0.759193	1
O43399	TPD54_HUMAN	1		0.470124	0
O43402	EMC8_HUMAN	0		0.460613	0
O43405	COCH_HUMAN			0.585627	1
O43422	P52K_HUMAN	0		0.554048	0
O43424	GRID2_HUMAN			0.0925208	0
O43426	SYNJ1_HUMAN			0.356824	0
O43427	FIBP_HUMAN			0.330362	0
O43432	IF4G3_HUMAN	1		0.80815	1
O43435	TBX1_HUMAN			0.896633	1
O43439	MTG8R_HUMAN			0.501931	0
O43447	PPIH_HUMAN			0.923731	1
O43448	KCAB3_HUMAN			0.161908	0
O43451	MGA_HUMAN			0.193268	0
O43462	MBTP2_HUMAN	0		0.0972015	0
O43463	SUV91_HUMAN			0.893513	1
O43464	HTRA2_HUMAN			0.63	1
O43474	KLF4_HUMAN			0.850902	1
O43482	MS18B_HUMAN			0.222978	0
O43488	ARK72_HUMAN	0		0.130672	0
O43490	PROM1_HUMAN			0.0815459	0
O43491	E41L2_HUMAN	1		0.909034	1
O43493	TGON2_HUMAN		0	0.211717	0
O43497	CAC1G_HUMAN			0.0699425	0
O43502	RA51C_HUMAN			0.618517	1
O43504	LTOR5_HUMAN	0		0.493318	0
O43505	B4GA1_HUMAN			0.104352	0
O43506	ADA20_HUMAN			0.104703	0
O43508	TNF12_HUMAN			0.0884776	0
O43511	S26A4_HUMAN	0		0.120648	0
O43513	MED7_HUMAN			0.128204	0
O43516	WIPF1_HUMAN			0.802728	1
O43520	AT8B1_HUMAN			0.0728512	0
O43521	B2L11_HUMAN			0.0865346	0
O43524	FOXO3_HUMAN			0.285581	0
O43525	KCNQ3_HUMAN			0.0940654	0
O43526	KCNQ2_HUMAN			0.0882735	0
O43529	CHSTA_HUMAN			0.243363	0
O43541	SMAD6_HUMAN	1		0.700607	1
O43542	XRCC3_HUMAN			0.274156	0
O43543	XRCC2_HUMAN			0.119296	0
O43548	TGM5_HUMAN			0.119971	0
O43556	SGCE_HUMAN		0	0.0854821	0
O43557	TNF14_HUMAN			0.0708856	0
O43559	FRS3_HUMAN			0.398296	0
O43561	LAT_HUMAN			0.0649042	0
O43566	RGS14_HUMAN			0.319922	0
O43567	RNF13_HUMAN	0		0.128872	0
O43570	CAH12_HUMAN			0.0824526	0
O43572	AKA10_HUMAN	0		0.172939	0
O43581	SYT7_HUMAN			0.214127	0
O43583	DENR_HUMAN	1		0.929305	1
O43586	PPIP1_HUMAN			0.693335	1
O43592	XPOT_HUMAN	1		0.511919	0
O43593	HAIR_HUMAN			0.177167	0
O43597	SPY2_HUMAN			0.167617	0
O43598	DNPH1_HUMAN	0		0.433937	0
O43602	DCX_HUMAN			0.902888	1
O43603	GALR2_HUMAN			0.0577334	0
O43609	SPY1_HUMAN			0.223335	0
O43610	SPY3_HUMAN			0.072483	0
O43612	OREX_HUMAN	0		0.0624751	0
O43613	OX1R_HUMAN			0.0605161	0
O43614	OX2R_HUMAN	0		0.0629822	0
O43615	TIM44_HUMAN			0.436362	0
O43617	TPPC3_HUMAN	0		0.471633	0
O43623	SNAI2_HUMAN			0.851388	1
O43633	CHM2A_HUMAN	0		0.807144	1
O43639	NCK2_HUMAN			0.837361	1
O43653	PSCA_HUMAN			0.0732405	0
O43660	PLRG1_HUMAN		1	0.925016	1
O43663	PRC1_HUMAN		1	0.602108	1
O43665	RGS10_HUMAN	0		0.487825	0
O43670	ZN207_HUMAN		1	0.919295	1
O43674	NDUB5_HUMAN	0		0.0987932	0
O43676	NDUB3_HUMAN		0	0.588873	1
O43678	NDUA2_HUMAN			0.73629	1
O43679	LDB2_HUMAN			0.856447	1
O43680	TCF21_HUMAN			0.849755	1
O43681	GET3_HUMAN			0.170866	0
O43683	BUB1_HUMAN			0.41084	0
O43684	BUB3_HUMAN	1		0.917709	1
O43687	AKA7A_HUMAN			0.586787	1
O43688	PLPP2_HUMAN	0		0.0691424	0
O43699	SIGL6_HUMAN			0.277738	0
O43704	ST1B1_HUMAN			0.313271	0
O43707	ACTN4_HUMAN	1		0.420635	0
O43708	MAAI_HUMAN			0.571832	1
O43709	BUD23_HUMAN	1		0.908203	1
O43711	TLX3_HUMAN			0.0771984	0
O43715	TRIA1_HUMAN	0		0.237788	0
O43716	GATC_HUMAN	1		0.440526	0
O43719	HTSF1_HUMAN	1		0.929714	1
O43731	ERD23_HUMAN			0.0796835	0
O43734	CIKS_HUMAN			0.240429	0
O43739	CYH3_HUMAN			0.815517	1
O43741	AAKB2_HUMAN	0		0.208145	0
O43745	CHP2_HUMAN			0.253485	0
O43747	AP1G1_HUMAN			0.870785	1
O43749	OR1F1_HUMAN			0.0536594	0
O43752	STX6_HUMAN	0		0.286424	0
O43759	SNG1_HUMAN			0.0881155	0
O43760	SNG2_HUMAN	0		0.0761448	0
O43761	SNG3_HUMAN			0.0682569	0
O43763	TLX2_HUMAN			0.0820807	0
O43765	SGTA_HUMAN	1		0.773556	1
O43766	LIAS_HUMAN			0.269375	0
O43768	ENSA_HUMAN	1		0.848155	1
O43772	MCAT_HUMAN		1	0.304037	0
O43776	SYNC_HUMAN	1		0.920778	1
O43781	DYRK3_HUMAN			0.67104	1
O43790	KRT86_HUMAN			0.320268	0
O43791	SPOP_HUMAN			0.799962	1
O43795	MYO1B_HUMAN			0.881354	1
O43805	SSNA1_HUMAN			0.210799	0
O43808	PM34_HUMAN			0.141076	0
O43809	CPSF5_HUMAN		1	0.536762	0
O43813	LANC1_HUMAN			0.341464	0
O43815	STRN_HUMAN			0.923726	1
O43818	U3IP2_HUMAN	1		0.920331	1
O43819	SCO2_HUMAN			0.152267	0
O43820	HYAL3_HUMAN			0.235463	0
O43822	CF410_HUMAN			0.386015	0
O43823	AKAP8_HUMAN	1		0.927355	1
O43825	B3GT2_HUMAN			0.10849	0
O43826	G6PT1_HUMAN			0.624703	1
O43827	ANGL7_HUMAN			0.139443	0
O43829	ZBT14_HUMAN			0.915761	1
O43837	IDH3B_HUMAN			0.896494	1
O43847	NRDC_HUMAN	0		0.696015	1
O43852	CALU_HUMAN			0.749589	1
O43854	EDIL3_HUMAN			0.531111	0
O43861	ATP9B_HUMAN			0.0695871	0
O43865	SAHH2_HUMAN	0		0.82225	1
O43866	CD5L_HUMAN			0.742483	1
O43868	S28A2_HUMAN			0.0590168	0
O43889	CREB3_HUMAN			0.0733054	0
O43895	XPP2_HUMAN			0.177549	0
O43896	KIF1C_HUMAN	1		0.23565	0
O43897	TLL1_HUMAN			0.259127	0
O43900	PRIC3_HUMAN			0.229143	0
O43903	GAS2_HUMAN	1		0.884073	1
O43909	EXTL3_HUMAN			0.119222	0
O43913	ORC5_HUMAN		0	0.111701	0
O43914	TYOBP_HUMAN			0.0698871	0
O43915	VEGFD_HUMAN	0		0.0808388	0
O43916	CHST1_HUMAN			0.207946	0
O43918	AIRE_HUMAN			0.112922	0
O43920	NDUS5_HUMAN		0	0.587041	1
O43921	EFNA2_HUMAN			0.116292	0
O43924	PDE6D_HUMAN			0.434221	0
O43927	CXL13_HUMAN			0.110333	0
O43929	ORC4_HUMAN	0		0.200705	0
O43933	PEX1_HUMAN			0.448673	0
O60216	RAD21_HUMAN	1		0.789111	1
O60218	AK1BA_HUMAN			0.146078	0
O60220	TIM8A_HUMAN	0		0.0977966	0
O60229	KALRN_HUMAN			0.383412	0
O60231	DHX16_HUMAN			0.906833	1
O60232	ZNRD2_HUMAN	0		0.214746	0
O60235	TM11D_HUMAN			0.859692	1
O60237	MYPT2_HUMAN			0.689695	1
O60238	BNI3L_HUMAN			0.0910931	0
O60239	3BP5_HUMAN			0.678626	1
O60240	PLIN1_HUMAN			0.24416	0
O60241	AGRB2_HUMAN	0		0.0736379	0
O60242	AGRB3_HUMAN			0.0941466	0
O60243	H6ST1_HUMAN			0.29868	0
O60244	MED14_HUMAN	1		0.610569	1
O60248	SOX15_HUMAN			0.660707	1
O60256	KPRB_HUMAN			0.293498	0
O60258	FGF17_HUMAN			0.652577	1
O60259	KLK8_HUMAN			0.896175	1
O60260	PRKN_HUMAN			0.518176	0
O60264	SMCA5_HUMAN	1		0.911136	1
O60266	ADCY3_HUMAN			0.0741264	0
O60269	GRIN2_HUMAN			0.0665762	0
O60271	JIP4_HUMAN	1		0.758389	1
O60281	ZN292_HUMAN			0.907677	1
O60282	KIF5C_HUMAN			0.502319	0
O60284	ST18_HUMAN	0		0.897975	1
O60285	NUAK1_HUMAN			0.556584	0
O60291	MGRN1_HUMAN			0.325102	0
O60292	SI1L3_HUMAN			0.46456	0
O60293	ZC3H1_HUMAN		1	0.85104	1
O60294	TYW4_HUMAN		1	0.373168	0
O60296	TRAK2_HUMAN			0.123823	0
O60303	KATIP_HUMAN			0.311503	0
O60304	ZN500_HUMAN			0.807192	1
O60306	AQR_HUMAN	1		0.860222	1
O60307	MAST3_HUMAN			0.298943	0
O60308	CE104_HUMAN			0.853367	1
O60312	AT10A_HUMAN			0.0700667	0
O60313	OPA1_HUMAN			0.775217	1
O60315	ZEB2_HUMAN			0.915323	1
O60318	GANP_HUMAN	1		0.705731	1
O60331	PI51C_HUMAN			0.434548	0
O60333	KIF1B_HUMAN	1		0.224707	0
O60336	MABP1_HUMAN			0.837716	1
O60337	MARH6_HUMAN	0		0.0656871	0
O60341	KDM1A_HUMAN			0.785946	1
O60343	TBCD4_HUMAN	0		0.158075	0
O60346	PHLP1_HUMAN			0.621938	1
O60353	FZD6_HUMAN			0.0659107	0
O60356	NUPR1_HUMAN			0.841554	1
O60359	CCG3_HUMAN			0.07552	0
O60381	HBP1_HUMAN			0.726039	1
O60383	GDF9_HUMAN			0.0730394	0
O60391	NMD3B_HUMAN			0.10273	0
O60393	NOBOX_HUMAN			0.106994	0
O60423	AT8B3_HUMAN		0	0.0690721	0
O60427	FADS1_HUMAN	0		0.444895	0
O60437	PEPL_HUMAN			0.69581	1
O60443	GSDME_HUMAN	0		0.289534	0
O60447	EVI5_HUMAN			0.231361	0
O60449	LY75_HUMAN			0.285092	0
O60462	NRP2_HUMAN			0.083619	0
O60469	DSCAM_HUMAN			0.554504	0
O60476	MA1A2_HUMAN			0.10661	0
O60477	BRNP1_HUMAN			0.357318	0
O60478	G137B_HUMAN			0.0761681	0
O60479	DLX3_HUMAN			0.0798867	0
O60481	ZIC3_HUMAN			0.918278	1
O60486	PLXC1_HUMAN			0.119897	0
O60487	MPZL2_HUMAN			0.392091	0
O60488	ACSL4_HUMAN			0.187984	0
O60493	SNX3_HUMAN			0.812578	1
O60494	CUBN_HUMAN			0.130794	0
O60496	DOK2_HUMAN			0.16682	0
O60499	STX10_HUMAN			0.164741	0
O60500	NPHN_HUMAN			0.249022	0
O60502	OGA_HUMAN	0		0.764659	1
O60503	ADCY9_HUMAN			0.0878785	0
O60504	VINEX_HUMAN			0.667926	1
O60506	HNRPQ_HUMAN			0.933645	1
O60507	TPST1_HUMAN	0		0.206289	0
O60508	PRP17_HUMAN	1		0.924006	1
O60512	B4GT3_HUMAN			0.174449	0
O60513	B4GT4_HUMAN			0.444588	0
O60516	4EBP3_HUMAN			0.199066	0
O60519	CRBL2_HUMAN			0.906009	1
O60524	NEMF_HUMAN		1	0.916439	1
O60543	CIDEA_HUMAN			0.226513	0
O60547	GMDS_HUMAN	0		0.236284	0
O60548	FOXD2_HUMAN			0.13805	0
O60551	NMT2_HUMAN			0.900637	1
O60563	CCNT1_HUMAN		1	0.291345	0
O60565	GREM1_HUMAN			0.290291	0
O60566	BUB1B_HUMAN			0.33126	0
O60568	PLOD3_HUMAN			0.161109	0
O60573	IF4E2_HUMAN	1		0.793831	1
O60583	CCNT2_HUMAN		1	0.43428	0
O60602	TLR5_HUMAN			0.11849	0
O60603	TLR2_HUMAN			0.161788	0
O60609	GFRA3_HUMAN	0		0.0821416	0
O60610	DIAP1_HUMAN		1	0.771077	1
O60635	TSN1_HUMAN			0.0647933	0
O60636	TSN2_HUMAN			0.0716841	0
O60641	AP180_HUMAN			0.712913	1
O60645	EXOC3_HUMAN	0		0.177232	0
O60656	UD19_HUMAN			0.0784975	0
O60658	PDE8A_HUMAN			0.697927	1
O60662	KLH41_HUMAN			0.707511	1
O60663	LMX1B_HUMAN			0.259067	0
O60664	PLIN3_HUMAN			0.103532	0
O60667	FCMR_HUMAN			0.263856	0
O60669	MOT2_HUMAN			0.34436	0
O60671	RAD1_HUMAN			0.676434	1
O60673	REV3L_HUMAN			0.600396	1
O60674	JAK2_HUMAN			0.12129	0
O60675	MAFK_HUMAN			0.81874	1
O60678	ANM3_HUMAN	1		0.888086	1
O60682	MUSC_HUMAN			0.610895	1
O60683	PEX10_HUMAN			0.102007	0
O60684	IMA7_HUMAN			0.844858	1
O60687	SRPX2_HUMAN			0.46819	0
O60701	UGDH_HUMAN	0		0.232149	0
O60704	TPST2_HUMAN	0		0.175397	0
O60706	ABCC9_HUMAN			0.0850364	0
O60711	LPXN_HUMAN			0.712938	1
O60716	CTND1_HUMAN	1		0.871345	1
O60721	NCKX1_HUMAN	0		0.072435	0
O60725	ICMT_HUMAN			0.0674039	0
O60729	CC14B_HUMAN			0.74093	1
O60733	PLPL9_HUMAN			0.393752	0
O60741	HCN1_HUMAN			0.0752534	0
O60749	SNX2_HUMAN			0.362451	0
O60755	GALR3_HUMAN			0.0578071	0
O60759	CYTIP_HUMAN			0.850591	1
O60760	HPGDS_HUMAN			0.513662	0
O60762	DPM1_HUMAN	0		0.112275	0
O60763	USO1_HUMAN	1		0.554798	0
O60779	S19A2_HUMAN			0.0852721	0
O60783	RT14_HUMAN	1		0.903979	1
O60784	TOM1_HUMAN			0.567324	1
O60806	TBX19_HUMAN	0		0.286665	0
O60812	HNRC1_HUMAN			0.932179	1
O60814	H2B1K_HUMAN			0.918768	1
O60825	F262_HUMAN			0.898315	1
O60826	CCD22_HUMAN			0.17624	0
O60828	PQBP1_HUMAN	1		0.918562	1
O60829	PAGE4_HUMAN			0.222937	0
O60830	TI17B_HUMAN	0		0.158386	0
O60831	PRAF2_HUMAN			0.0634125	0
O60832	DKC1_HUMAN	1		0.928868	1
O60840	CAC1F_HUMAN			0.0703467	0
O60841	IF2P_HUMAN	1		0.932012	1
O60844	ZG16_HUMAN			0.357915	0
O60858	TRI13_HUMAN			0.169565	0
O60861	GAS7_HUMAN			0.86096	1
O60869	EDF1_HUMAN		1	0.918944	1
O60870	KIN17_HUMAN		1	0.931585	1
O60879	DIAP2_HUMAN			0.773672	1
O60880	SH21A_HUMAN			0.563609	0
O60882	MMP20_HUMAN			0.228234	0
O60883	G37L1_HUMAN			0.0594132	0
O60884	DNJA2_HUMAN	1		0.930292	1
O60885	BRD4_HUMAN	1		0.845003	1
O60888	CUTA_HUMAN	0		0.0856673	0
O60890	OPHN1_HUMAN			0.244152	0
O60894	RAMP1_HUMAN			0.068681	0
O60895	RAMP2_HUMAN			0.0794251	0
O60896	RAMP3_HUMAN			0.0757864	0
O60902	SHOX2_HUMAN			0.092354	0
O60906	NSMA_HUMAN			0.0786528	0
O60907	TBL1X_HUMAN		0	0.901179	1
O60909	B4GT2_HUMAN			0.298858	0
O60911	CATL2_HUMAN			0.429724	0
O60921	HUS1_HUMAN	0		0.897602	1
O60925	PFD1_HUMAN			0.34632	0
O60927	PP1RB_HUMAN			0.141484	0
O60928	KCJ13_HUMAN			0.0658377	0
O60930	RNH1_HUMAN	1		0.851791	1
O60931	CTNS_HUMAN	0		0.0737999	0
O60934	NBN_HUMAN		0	0.84901	1
O60936	NOL3_HUMAN	1		0.289769	0
O60938	KERA_HUMAN			0.427696	0
O60939	SCN2B_HUMAN			0.554351	0
O60941	DTNB_HUMAN			0.304383	0
O60942	MCE1_HUMAN	1		0.907931	1
O75015	FCG3B_HUMAN			0.14331	0
O75019	LIRA1_HUMAN			0.155534	0
O75022	LIRB3_HUMAN			0.148523	0
O75023	LIRB5_HUMAN			0.140831	0
O75027	ABCB7_HUMAN		1	0.156999	0
O75030	MITF_HUMAN			0.59346	1
O75031	HSF2B_HUMAN			0.432973	0
O75037	KI21B_HUMAN			0.753602	1
O75038	PLCH2_HUMAN			0.366221	0
O75044	SRGP2_HUMAN			0.186799	0
O75051	PLXA2_HUMAN			0.124297	0
O75052	CAPON_HUMAN	0		0.372379	0
O75054	IGSF3_HUMAN			0.40717	0
O75056	SDC3_HUMAN			0.0723219	0
O75061	AUXI_HUMAN			0.915698	1
O75063	XYLK_HUMAN	0		0.0932063	0
O75069	TMCC2_HUMAN			0.190393	0
O75072	FKTN_HUMAN			0.275887	0
O75074	LRP3_HUMAN			0.107485	0
O75077	ADA23_HUMAN			0.141112	0
O75078	ADA11_HUMAN			0.108133	0
O75081	MTG16_HUMAN			0.311905	0
O75083	WDR1_HUMAN	1		0.917112	1
O75084	FZD7_HUMAN			0.0617205	0
O75093	SLIT1_HUMAN			0.516427	0
O75094	SLIT3_HUMAN			0.602981	1
O75096	LRP4_HUMAN			0.265513	0
O75106	AOC2_HUMAN			0.0760617	0
O75110	ATP9A_HUMAN			0.0697718	0
O75112	LDB3_HUMAN	1		0.538848	0
O75113	N4BP1_HUMAN	1		0.365972	0
O75116	ROCK2_HUMAN	1		0.767212	1
O75121	MFA3L_HUMAN			0.200585	0
O75122	CLAP2_HUMAN			0.818929	1
O75127	PTCD1_HUMAN	1		0.891653	1
O75128	COBL_HUMAN	1		0.209162	0
O75129	ASTN2_HUMAN			0.119915	0
O75131	CPNE3_HUMAN		1	0.542242	0
O75132	ZBED4_HUMAN			0.590274	1
O75140	DEPD5_HUMAN			0.162157	0
O75143	ATG13_HUMAN			0.127242	0
O75144	ICOSL_HUMAN			0.151991	0
O75145	LIPA3_HUMAN			0.195728	0
O75146	HIP1R_HUMAN			0.145379	0
O75147	OBSL1_HUMAN			0.641567	1
O75150	BRE1B_HUMAN	1		0.703343	1
O75151	PHF2_HUMAN			0.879265	1
O75152	ZC11A_HUMAN		1	0.889356	1
O75154	RFIP3_HUMAN			0.185133	0
O75155	CAND2_HUMAN			0.806701	1
O75159	SOCS5_HUMAN			0.269278	0
O75161	NPHP4_HUMAN			0.133604	0
O75164	KDM4A_HUMAN			0.832486	1
O75165	DJC13_HUMAN	1		0.532504	0
O75167	PHAR2_HUMAN			0.835449	1
O75170	PP6R2_HUMAN			0.444719	0
O75173	ATS4_HUMAN			0.151707	0
O75175	CNOT3_HUMAN		1	0.311072	0
O75177	CREST_HUMAN			0.791804	1
O75179	ANR17_HUMAN	1		0.492124	0
O75182	SIN3B_HUMAN			0.495117	0
O75185	AT2C2_HUMAN			0.0996462	0
O75190	DNJB6_HUMAN	1		0.931375	1
O75191	XYLB_HUMAN			0.0946163	0
O75192	PX11A_HUMAN			0.187659	0
O75197	LRP5_HUMAN			0.340567	0
O75204	TM127_HUMAN			0.0691435	0
O75208	COQ9_HUMAN		0	0.133717	0
O75223	GGCT_HUMAN	1		0.868579	1
O75251	NDUS7_HUMAN	0		0.0797788	0
O75293	GA45B_HUMAN			0.625221	1
O75298	RTN2_HUMAN	0		0.0725584	0
O75306	NDUS2_HUMAN			0.663951	1
O75309	CAD16_HUMAN			0.0946527	0
O75311	GLRA3_HUMAN			0.0733939	0
O75312	ZPR1_HUMAN	1		0.848226	1
O75317	UBP12_HUMAN			0.87026	1
O75319	DUS11_HUMAN	1		0.854935	1
O75323	NIPS2_HUMAN	0		0.761472	1
O75324	SNN_HUMAN			0.0695163	0
O75326	SEM7A_HUMAN			0.218993	0
O75330	HMMR_HUMAN		1	0.619398	1
O75334	LIPA2_HUMAN			0.262972	0
O75339	CILP1_HUMAN			0.445272	0
O75340	PDCD6_HUMAN	1		0.533729	0
O75342	LX12B_HUMAN			0.344712	0
O75343	GCYB2_HUMAN			0.852199	1
O75344	FKBP6_HUMAN			0.666103	1
O75347	TBCA_HUMAN	1		0.772328	1
O75348	VATG1_HUMAN			0.683213	1
O75351	VPS4B_HUMAN		1	0.819789	1
O75354	ENTP6_HUMAN			0.287267	0
O75355	ENTP3_HUMAN			0.0700763	0
O75356	ENTP5_HUMAN		0	0.107656	0
O75360	PROP1_HUMAN			0.0813987	0
O75362	ZN217_HUMAN			0.916576	1
O75364	PITX3_HUMAN			0.0913927	0
O75365	TP4A3_HUMAN			0.849415	1
O75366	AVIL_HUMAN			0.805551	1
O75367	H2AY_HUMAN			0.915588	1
O75368	SH3L1_HUMAN		1	0.695879	1
O75369	FLNB_HUMAN			0.490817	0
O75376	NCOR1_HUMAN			0.62609	1
O75379	VAMP4_HUMAN			0.754416	1
O75380	NDUS6_HUMAN	1		0.88072	1
O75381	PEX14_HUMAN	0		0.203948	0
O75382	TRIM3_HUMAN			0.739007	1
O75385	ULK1_HUMAN			0.189447	0
O75386	TULP3_HUMAN			0.878832	1
O75387	LAT3_HUMAN			0.118529	0
O75390	CISY_HUMAN	1		0.87151	1
O75396	SC22B_HUMAN	1		0.241015	0
O75398	DEAF1_HUMAN			0.445601	0
O75400	PR40A_HUMAN	1		0.930213	1
O75409	HYPM_HUMAN			0.142685	0
O75410	TACC1_HUMAN			0.299249	0
O75414	NDK6_HUMAN			0.247598	0
O75417	DPOLQ_HUMAN			0.791359	1
O75419	CDC45_HUMAN			0.810709	1
O75420	GGYF1_HUMAN	1		0.834534	1
O75425	MSPD3_HUMAN	0		0.116743	0
O75426	FBX24_HUMAN			0.841731	1
O75427	LRCH4_HUMAN	0		0.307235	0
O75431	MTX2_HUMAN	0		0.477134	0
O75436	VP26A_HUMAN	0		0.579434	1
O75438	NDUB1_HUMAN		0	0.171616	0
O75439	MPPB_HUMAN	0		0.57929	1
O75443	TECTA_HUMAN			0.144414	0
O75444	MAF_HUMAN			0.320848	0
O75445	USH2A_HUMAN			0.174578	0
O75446	SAP30_HUMAN			0.782019	1
O75448	MED24_HUMAN			0.336253	0
O75449	KTNA1_HUMAN			0.665179	1
O75452	RDH16_HUMAN			0.146625	0
O75460	ERN1_HUMAN	1		0.334571	0
O75461	E2F6_HUMAN			0.469343	0
O75462	CRLF1_HUMAN			0.179476	0
O75469	NR1I2_HUMAN			0.89615	1
O75473	LGR5_HUMAN			0.100898	0
O75475	PSIP1_HUMAN	1		0.927272	1
O75477	ERLN1_HUMAN	0		0.364306	0
O75478	TAD2A_HUMAN			0.893513	1
O75486	SUPT3_HUMAN			0.287151	0
O75487	GPC4_HUMAN			0.0866828	0
O75489	NDUS3_HUMAN	1		0.73523	1
O75494	SRS10_HUMAN	1		0.953092	1
O75496	GEMI_HUMAN			0.512523	0
O75503	CLN5_HUMAN			0.190507	0
O75506	HSBP1_HUMAN	0		0.19128	0
O75508	CLD11_HUMAN			0.0576731	0
O75509	TNR21_HUMAN			0.13757	0
O75521	ECI2_HUMAN			0.808619	1
O75525	KHDR3_HUMAN			0.920006	1
O75528	TADA3_HUMAN			0.888447	1
O75529	TAF5L_HUMAN			0.908885	1
O75530	EED_HUMAN	1		0.918396	1
O75531	BAF_HUMAN	0		0.400308	0
O75533	SF3B1_HUMAN	1		0.874524	1
O75534	CSDE1_HUMAN	1		0.922602	1
O75553	DAB1_HUMAN			0.860084	1
O75554	WBP4_HUMAN	1		0.932186	1
O75556	SG2A1_HUMAN			0.0729668	0
O75558	STX11_HUMAN			0.336263	0
O75563	SKAP2_HUMAN			0.801406	1
O75564	JERKY_HUMAN			0.786094	1
O75569	PRKRA_HUMAN	1		0.900293	1
O75570	RF1M_HUMAN	1		0.929841	1
O75575	RPC9_HUMAN			0.26235	0
O75578	ITA10_HUMAN			0.105256	0
O75581	LRP6_HUMAN			0.350344	0
O75582	KS6A5_HUMAN			0.844919	1
O75586	MED6_HUMAN	1		0.719689	1
O75592	MYCB2_HUMAN			0.713292	1
O75593	FOXH1_HUMAN			0.118656	0
O75594	PGRP1_HUMAN			0.153317	0
O75600	KBL_HUMAN		0	0.125731	0
O75602	SPAG6_HUMAN			0.694458	1
O75603	GCM2_HUMAN			0.236123	0
O75604	UBP2_HUMAN			0.687961	1
O75607	NPM3_HUMAN	1		0.876758	1
O75608	LYPA1_HUMAN			0.0702184	0
O75610	LFTY1_HUMAN			0.0695969	0
O75616	ERAL1_HUMAN	1		0.90638	1
O75618	DEDD_HUMAN			0.231916	0
O75626	PRDM1_HUMAN			0.883391	1
O75628	REM1_HUMAN			0.807364	1
O75629	CREG1_HUMAN			0.139908	0
O75631	UPK3A_HUMAN			0.0689305	0
O75636	FCN3_HUMAN	0		0.0937557	0
O75638	CTAG2_HUMAN			0.316508	0
O75643	U520_HUMAN	1		0.855693	1
O75648	MTU1_HUMAN	1		0.919177	1
O75663	TIPRL_HUMAN	0		0.166023	0
O75665	OFD1_HUMAN			0.659984	1
O75674	TM1L1_HUMAN			0.553338	0
O75676	KS6A4_HUMAN			0.787186	1
O75677	RFPL1_HUMAN			0.558028	0
O75679	RFPL3_HUMAN			0.562795	0
O75683	SURF6_HUMAN	1		0.941682	1
O75688	PPM1B_HUMAN			0.560398	0
O75689	ADAP1_HUMAN			0.547765	0
O75691	UTP20_HUMAN			0.76516	1
O75694	NU155_HUMAN	1		0.335989	0
O75695	XRP2_HUMAN	0		0.752976	1
O75712	CXB3_HUMAN			0.0824222	0
O75716	STK16_HUMAN			0.243229	0
O75717	WDHD1_HUMAN			0.896995	1
O75718	CRTAP_HUMAN	1		0.80069	1
O75746	S2512_HUMAN	0		0.536061	0
O75747	P3C2G_HUMAN			0.21116	0
O75751	S22A3_HUMAN			0.0671905	0
O75752	B3GL1_HUMAN			0.0865292	0
O75762	TRPA1_HUMAN			0.0923224	0
O75771	RA51D_HUMAN			0.766803	1
O75781	PALM_HUMAN		0	0.619128	1
O75783	RHBL1_HUMAN			0.111398	0
O75787	RENR_HUMAN	0		0.0805415	0
O75791	GRAP2_HUMAN			0.756306	1
O75792	RNH2A_HUMAN	1		0.864587	1
O75794	CD123_HUMAN		0	0.731354	1
O75795	UDB17_HUMAN			0.0682503	0
O75800	ZMY10_HUMAN			0.69812	1
O75807	PR15A_HUMAN			0.365363	0
O75808	CAN15_HUMAN			0.684079	1
O75815	BCAR3_HUMAN			0.473337	0
O75817	POP7_HUMAN	1		0.891554	1
O75818	RPP40_HUMAN	1		0.576467	1
O75821	EIF3G_HUMAN	1		0.932346	1
O75822	EIF3J_HUMAN	1		0.929698	1
O75828	CBR3_HUMAN			0.624622	1
O75829	CNMD_HUMAN			0.118401	0
O75832	PSD10_HUMAN			0.282473	0
O75838	CIB2_HUMAN			0.158857	0
O75840	KLF7_HUMAN			0.864364	1
O75841	UPK1B_HUMAN			0.0703929	0
O75843	AP1G2_HUMAN			0.781125	1
O75844	FACE1_HUMAN	0		0.121108	0
O75845	SC5D_HUMAN			0.110331	0
O75864	PPR37_HUMAN			0.363806	0
O75865	TPC6A_HUMAN			0.085247	0
O75871	CEAM4_HUMAN			0.0972725	0
O75874	IDHC_HUMAN			0.917829	1
O75879	GATB_HUMAN	1		0.777255	1
O75880	SCO1_HUMAN			0.134806	0
O75881	CP7B1_HUMAN	0		0.0796648	0
O75882	ATRN_HUMAN			0.257378	0
O75884	RBBP9_HUMAN			0.0754586	0
O75886	STAM2_HUMAN			0.857623	1
O75888	TNF13_HUMAN			0.17352	0
O75891	AL1L1_HUMAN			0.726226	1
O75896	TUSC2_HUMAN			0.770269	1
O75897	ST1C4_HUMAN			0.759921	1
O75899	GABR2_HUMAN			0.0830979	0
O75900	MMP23_HUMAN			0.137359	0
O75907	DGAT1_HUMAN			0.101515	0
O75908	SOAT2_HUMAN			0.0770735	0
O75909	CCNK_HUMAN		1	0.726631	1
O75911	DHRS3_HUMAN			0.173494	0
O75912	DGKI_HUMAN			0.860138	1
O75914	PAK3_HUMAN			0.36411	0
O75915	PRAF3_HUMAN	0		0.138783	0
O75916	RGS9_HUMAN			0.706717	1
O75920	SERF1_HUMAN			0.106375	0
O75923	DYSF_HUMAN			0.377257	0
O75925	PIAS1_HUMAN			0.437321	0
O75928	PIAS2_HUMAN			0.55318	0
O75934	SPF27_HUMAN	1		0.472991	0
O75935	DCTN3_HUMAN			0.265432	0
O75936	BODG_HUMAN			0.74407	1
O75937	DNJC8_HUMAN	1		0.934572	1
O75940	SPF30_HUMAN	1		0.920304	1
O75943	RAD17_HUMAN			0.802247	1
O75947	ATP5H_HUMAN	0		0.322678	0
O75951	LYZL6_HUMAN			0.0772598	0
O75952	CABYR_HUMAN			0.26582	0
O75955	FLOT1_HUMAN			0.529509	0
O75956	CDKA2_HUMAN			0.483781	0
O75962	TRIO_HUMAN			0.291512	0
O75964	ATP5L_HUMAN		0	0.489533	0
O75969	AKAP3_HUMAN			0.434549	0
O75970	MPDZ_HUMAN			0.881948	1
O75971	SNPC5_HUMAN			0.0787568	0
O75976	CBPD_HUMAN			0.244102	0
O75995	SASH3_HUMAN			0.90294	1
O76003	GLRX3_HUMAN		1	0.108979	0
O76011	KRT34_HUMAN			0.148825	0
O76013	KRT36_HUMAN			0.35809	0
O76014	KRT37_HUMAN			0.245728	0
O76015	KRT38_HUMAN			0.183855	0
O76021	RL1D1_HUMAN		1	0.933859	1
O76024	WFS1_HUMAN			0.0844893	0
O76027	ANXA9_HUMAN			0.511876	0
O76031	CLPX_HUMAN	1		0.672296	1
O76036	NCTR1_HUMAN			0.136527	0
O76039	CDKL5_HUMAN			0.583601	1
O76041	NEBL_HUMAN			0.757845	1
O76050	NEUL1_HUMAN			0.349039	0
O76054	S14L2_HUMAN			0.837514	1
O76061	STC2_HUMAN			0.173299	0
O76062	ERG24_HUMAN			0.0639927	0
O76064	RNF8_HUMAN			0.85664	1
O76070	SYUG_HUMAN			0.838323	1
O76071	CIAO1_HUMAN			0.905385	1
O76074	PDE5A_HUMAN			0.318106	0
O76075	DFFB_HUMAN			0.620299	1
O76076	CCN5_HUMAN			0.0762793	0
O76080	ZFAN5_HUMAN			0.785754	1
O76081	RGS20_HUMAN			0.079999	0
O76082	S22A5_HUMAN			0.0714464	0
O76083	PDE9A_HUMAN			0.229511	0
O76090	BEST1_HUMAN			0.0736404	0
O76093	FGF18_HUMAN		0	0.732266	1
O76094	SRP72_HUMAN	1		0.90376	1
O76095	JTB_HUMAN	0		0.0742083	0
O76096	CYTF_HUMAN			0.144153	0
O77932	DXO_HUMAN	1		0.53724	0
O94759	TRPM2_HUMAN			0.114972	0
O94760	DDAH1_HUMAN		0	0.881374	1
O94761	RECQ4_HUMAN			0.877811	1
O94762	RECQ5_HUMAN			0.904475	1
O94763	RMP_HUMAN	0		0.651455	1
O94766	B3GA3_HUMAN			0.114828	0
O94768	ST17B_HUMAN			0.202585	0
O94769	ECM2_HUMAN			0.550491	0
O94776	MTA2_HUMAN			0.804092	1
O94777	DPM2_HUMAN			0.0687122	0
O94778	AQP8_HUMAN	0		0.0660569	0
O94779	CNTN5_HUMAN			0.393904	0
O94782	UBP1_HUMAN	0		0.722856	1
O94788	AL1A2_HUMAN			0.308216	0
O94804	STK10_HUMAN	1		0.743315	1
O94805	ACL6B_HUMAN			0.384393	0
O94806	KPCD3_HUMAN			0.536836	0
O94808	GFPT2_HUMAN			0.115918	0
O94810	RGS11_HUMAN			0.86045	1
O94811	TPPP_HUMAN		1	0.915694	1
O94812	BAIP3_HUMAN			0.146543	0
O94813	SLIT2_HUMAN			0.613538	1
O94817	ATG12_HUMAN			0.39915	0
O94818	NOL4_HUMAN			0.658506	1
O94822	LTN1_HUMAN		1	0.259905	0
O94823	AT10B_HUMAN			0.0703344	0
O94826	TOM70_HUMAN			0.816717	1
O94827	PKHG5_HUMAN			0.197314	0
O94829	IPO13_HUMAN	1		0.303984	0
O94830	DDHD2_HUMAN			0.305625	0
O94832	MYO1D_HUMAN			0.874027	1
O94842	TOX4_HUMAN		0	0.675802	1
O94844	RHBT1_HUMAN			0.681123	1
O94850	DEND_HUMAN			0.143682	0
O94851	MICA2_HUMAN			0.826485	1
O94855	SC24D_HUMAN			0.84667	1
O94856	NFASC_HUMAN			0.516555	0
O94864	ST65G_HUMAN			0.221634	0
O94868	FCSD2_HUMAN			0.584904	1
O94874	UFL1_HUMAN	1		0.82707	1
O94875	SRBS2_HUMAN	1		0.547568	0
O94876	TMCC1_HUMAN			0.257992	0
O94880	PHF14_HUMAN			0.884606	1
O94885	SASH1_HUMAN			0.412664	0
O94886	TM63A_HUMAN			0.0722386	0
O94887	FARP2_HUMAN			0.226872	0
O94888	UBXN7_HUMAN			0.680731	1
O94889	KLH18_HUMAN			0.701142	1
O94892	ZN432_HUMAN			0.918489	1
O94898	LRIG2_HUMAN			0.172644	0
O94900	TOX_HUMAN			0.286964	0
O94901	SUN1_HUMAN	1		0.114703	0
O94905	ERLN2_HUMAN			0.425433	0
O94906	PRP6_HUMAN	1		0.914042	1
O94907	DKK1_HUMAN			0.275929	0
O94910	AGRL1_HUMAN			0.0819601	0
O94911	ABCA8_HUMAN			0.154448	0
O94913	PCF11_HUMAN	1		0.908063	1
O94915	FRYL_HUMAN			0.366682	0
O94916	NFAT5_HUMAN			0.702356	1
O94919	ENDD1_HUMAN		0	0.0825739	0
O94921	CDK14_HUMAN			0.703664	1
O94923	GLCE_HUMAN			0.206757	0
O94925	GLSK_HUMAN		0	0.697168	1
O94927	HAUS5_HUMAN		0	0.119761	0
O94929	ABLM3_HUMAN			0.363987	0
O94933	SLIK3_HUMAN			0.25012	0
O94941	RNF37_HUMAN			0.196882	0
O94953	KDM4B_HUMAN			0.79092	1
O94955	RHBT3_HUMAN			0.429739	0
O94956	SO2B1_HUMAN			0.0759451	0
O94964	MTCL2_HUMAN			0.209955	0
O94966	UBP19_HUMAN			0.627236	1
O94967	WDR47_HUMAN			0.833081	1
O94972	TRI37_HUMAN			0.239486	0
O94973	AP2A2_HUMAN			0.825939	1
O94979	SC31A_HUMAN		1	0.884245	1
O94983	CMTA2_HUMAN			0.428735	0
O94985	CSTN1_HUMAN			0.231959	0
O94986	CE152_HUMAN	1		0.492588	0
O94989	ARHGF_HUMAN			0.0943663	0
O94991	SLIK5_HUMAN			0.154427	0
O94992	HEXI1_HUMAN	1		0.765971	1
O94993	SOX30_HUMAN			0.295731	0
O95045	UPP2_HUMAN			0.820359	1
O95047	OR2A4_HUMAN			0.0553791	0
O95049	ZO3_HUMAN			0.886034	1
O95050	INMT_HUMAN			0.84923	1
O95057	DIRA1_HUMAN			0.870492	1
O95059	RPP14_HUMAN	1		0.549561	0
O95067	CCNB2_HUMAN			0.770722	1
O95069	KCNK2_HUMAN	0		0.0664063	0
O95070	YIF1A_HUMAN			0.0755376	0
O95071	UBR5_HUMAN			0.498573	0
O95072	REC8_HUMAN			0.0901704	0
O95073	FSBP_HUMAN	0		0.183733	0
O95096	NKX22_HUMAN		0	0.0896969	0
O95104	SCAF4_HUMAN		1	0.926187	1
O95125	ZN202_HUMAN			0.878395	1
O95136	S1PR2_HUMAN			0.0569433	0
O95139	NDUB6_HUMAN	0		0.254065	0
O95140	MFN2_HUMAN	0		0.238456	0
O95147	DUS14_HUMAN	1		0.70737	1
O95149	SPN1_HUMAN	1		0.878474	1
O95150	TNF15_HUMAN	0		0.090296	0
O95153	RIMB1_HUMAN			0.329088	0
O95154	ARK73_HUMAN			0.160308	0
O95155	UBE4B_HUMAN	0		0.200149	0
O95159	ZFPL1_HUMAN			0.101975	0
O95163	ELP1_HUMAN	1		0.73862	1
O95166	GBRAP_HUMAN			0.470259	0
O95167	NDUA3_HUMAN			0.0741066	0
O95168	NDUB4_HUMAN	0		0.368052	0
O95169	NDUB8_HUMAN	0		0.173444	0
O95171	SCEL_HUMAN			0.692742	1
O95180	CAC1H_HUMAN			0.071194	0
O95182	NDUA7_HUMAN	1		0.317555	0
O95183	VAMP5_HUMAN			0.225392	0
O95185	UNC5C_HUMAN			0.0916156	0
O95190	OAZ2_HUMAN			0.637634	1
O95196	CSPG5_HUMAN	0		0.111601	0
O95197	RTN3_HUMAN			0.0788676	0
O95198	KLHL2_HUMAN			0.862976	1
O95199	RCBT2_HUMAN			0.718979	1
O95201	RHIT_HUMAN			0.890863	1
O95202	LETM1_HUMAN			0.386233	0
O95206	PCDH8_HUMAN			0.223442	0
O95208	EPN2_HUMAN	0		0.782619	1
O95210	STBD1_HUMAN			0.126629	0
O95214	LERL1_HUMAN	0		0.0587056	0
O95218	ZRAB2_HUMAN	1		0.947519	1
O95219	SNX4_HUMAN			0.842376	1
O95229	ZWINT_HUMAN			0.638343	1
O95231	VENTX_HUMAN			0.0676489	0
O95232	LC7L3_HUMAN		1	0.946345	1
O95235	KI20A_HUMAN	0		0.135085	0
O95236	APOL3_HUMAN			0.0798547	0
O95237	LRAT_HUMAN		0	0.0883341	0
O95238	SPDEF_HUMAN			0.359056	0
O95239	KIF4A_HUMAN	1		0.295732	0
O95243	MBD4_HUMAN			0.491074	0
O95248	MTMR5_HUMAN			0.361707	0
O95249	GOSR1_HUMAN			0.150812	0
O95251	KAT7_HUMAN		1	0.859236	1
O95255	MRP6_HUMAN			0.0754506	0
O95256	I18RA_HUMAN			0.297084	0
O95257	GA45G_HUMAN			0.398771	0
O95258	UCP5_HUMAN			0.171837	0
O95259	KCNH1_HUMAN			0.0751158	0
O95260	ATE1_HUMAN			0.852172	1
O95263	PDE8B_HUMAN			0.620565	1
O95264	5HT3B_HUMAN			0.0603582	0
O95267	GRP1_HUMAN			0.20292	0
O95271	TNKS1_HUMAN			0.199628	0
O95273	CCDB1_HUMAN			0.332549	0
O95274	LYPD3_HUMAN			0.0958455	0
O95278	EPM2A_HUMAN			0.80868	1
O95279	KCNK5_HUMAN			0.0785955	0
O95292	VAPB_HUMAN			0.84323	1
O95294	RASL1_HUMAN			0.790261	1
O95295	SNAPN_HUMAN			0.201587	0
O95297	MPZL1_HUMAN	0		0.134245	0
O95298	NDUC2_HUMAN			0.139735	0
O95299	NDUAA_HUMAN	1		0.857729	1
O95302	FKBP9_HUMAN	1		0.883161	1
O95319	CELF2_HUMAN	1		0.920073	1
O95340	PAPS2_HUMAN			0.596418	1
O95342	ABCBB_HUMAN			0.126593	0
O95343	SIX3_HUMAN			0.218687	0
O95347	SMC2_HUMAN	1		0.875475	1
O95352	ATG7_HUMAN	0		0.781536	1
O95359	TACC2_HUMAN			0.104662	0
O95361	TRI16_HUMAN			0.814708	1
O95363	SYFM_HUMAN	1		0.893541	1
O95365	ZBT7A_HUMAN	1		0.887872	1
O95372	LYPA2_HUMAN			0.0633764	0
O95373	IPO7_HUMAN	1		0.771037	1
O95376	ARI2_HUMAN			0.751663	1
O95377	CXB5_HUMAN			0.0654577	0
O95379	TFIP8_HUMAN			0.505004	0
O95382	M3K6_HUMAN			0.234382	0
O95388	CCN4_HUMAN			0.104256	0
O95389	CCN6_HUMAN			0.0918529	0
O95390	GDF11_HUMAN			0.0660782	0
O95391	SLU7_HUMAN	1		0.932714	1
O95393	BMP10_HUMAN			0.0888429	0
O95394	AGM1_HUMAN		0	0.83167	1
O95395	GCNT3_HUMAN			0.234121	0
O95396	MOCS3_HUMAN	1		0.898827	1
O95398	RPGF3_HUMAN			0.38082	0
O95399	UTS2_HUMAN	0		0.0759873	0
O95400	CD2B2_HUMAN	1		0.910902	1
O95402	MED26_HUMAN			0.321327	0
O95405	ZFYV9_HUMAN			0.236589	0
O95406	CNIH1_HUMAN			0.0561976	0
O95407	TNF6B_HUMAN	0		0.0992383	0
O95409	ZIC2_HUMAN			0.901634	1
O95415	BRI3_HUMAN	0		0.0969519	0
O95416	SOX14_HUMAN			0.112136	0
O95425	SVIL_HUMAN			0.390453	0
O95427	PIGN_HUMAN		0	0.0593725	0
O95428	PPN_HUMAN			0.125556	0
O95429	BAG4_HUMAN		1	0.797261	1
O95433	AHSA1_HUMAN	1		0.746236	1
O95436	NPT2B_HUMAN			0.0773454	0
O95445	APOM_HUMAN	0		0.097033	0
O95447	LCA5L_HUMAN			0.423629	0
O95450	ATS2_HUMAN			0.169859	0
O95452	CXB6_HUMAN			0.0681818	0
O95453	PARN_HUMAN	1		0.920891	1
O95455	TGDS_HUMAN			0.20238	0
O95456	PSMG1_HUMAN	0		0.421796	0
O95460	MATN4_HUMAN			0.242736	0
O95461	LARG1_HUMAN			0.319814	0
O95466	FMNL1_HUMAN			0.366836	0
O95467	GNAS3_HUMAN			0.324915	0
O95470	SGPL1_HUMAN			0.737831	1
O95471	CLD7_HUMAN			0.0794972	0
O95475	SIX6_HUMAN			0.262674	0
O95476	CNEP1_HUMAN			0.0819075	0
O95477	ABCA1_HUMAN			0.184533	0
O95479	G6PE_HUMAN			0.239426	0
O95484	CLD9_HUMAN			0.0564691	0
O95486	SC24A_HUMAN			0.575883	1
O95487	SC24B_HUMAN	0		0.678107	1
O95490	AGRL2_HUMAN			0.0717582	0
O95497	VNN1_HUMAN	0		0.122567	0
O95498	VNN2_HUMAN			0.102813	0
O95500	CLD14_HUMAN			0.0632599	0
O95503	CBX6_HUMAN			0.617145	1
O95528	GTR10_HUMAN			0.0764254	0
O95544	NADK_HUMAN			0.510389	0
O95551	TYDP2_HUMAN	1		0.670957	1
O95562	SFT2B_HUMAN			0.0737846	0
O95563	MPC2_HUMAN	0		0.224149	0
O95568	MET18_HUMAN			0.867006	1
O95571	ETHE1_HUMAN	0		0.136706	0
O95573	ACSL3_HUMAN	1		0.13015	0
O95600	KLF8_HUMAN			0.914001	1
O95602	RPA1_HUMAN	1		0.889042	1
O95613	PCNT_HUMAN			0.166556	0
O95619	YETS4_HUMAN	1		0.842552	1
O95622	ADCY5_HUMAN			0.0822787	0
O95628	CNOT4_HUMAN	1		0.907282	1
O95630	STABP_HUMAN	0		0.754212	1
O95631	NET1_HUMAN			0.504477	0
O95633	FSTL3_HUMAN	0		0.0993101	0
O95639	CPSF4_HUMAN	1		0.888118	1
O95644	NFAC1_HUMAN			0.192745	0
O95670	VATG2_HUMAN			0.871704	1
O95671	ASML_HUMAN			0.71563	1
O95672	ECEL1_HUMAN			0.455109	0
O95674	CDS2_HUMAN	0		0.0925899	0
O95677	EYA4_HUMAN	0		0.0886104	0
O95678	K2C75_HUMAN			0.808154	1
O95684	CEP43_HUMAN		1	0.847379	1
O95696	BRD1_HUMAN	1		0.803227	1
O95704	APBB3_HUMAN			0.532001	0
O95707	RPP29_HUMAN		1	0.889858	1
O95711	LY86_HUMAN			0.116492	0
O95714	HERC2_HUMAN			0.79556	1
O95715	CXL14_HUMAN			0.359306	0
O95716	RAB3D_HUMAN			0.836765	1
O95718	ERR2_HUMAN			0.621058	1
O95721	SNP29_HUMAN		0	0.585617	1
O95727	CRTAM_HUMAN			0.269342	0
O95741	CPNE6_HUMAN			0.37674	0
O95747	OXSR1_HUMAN	0		0.301273	0
O95749	GGPPS_HUMAN			0.440783	0
O95750	FGF19_HUMAN	0		0.13098	0
O95751	LDOC1_HUMAN			0.240296	0
O95754	SEM4F_HUMAN			0.261903	0
O95755	RAB36_HUMAN			0.526364	0
O95758	PTBP3_HUMAN			0.921366	1
O95760	IL33_HUMAN			0.69954	1
O95772	STR3N_HUMAN			0.0663102	0
O95777	LSM8_HUMAN	1		0.881591	1
O95782	AP2A1_HUMAN		1	0.850263	1
O95785	WIZ_HUMAN	1		0.910023	1
O95786	RIGI_HUMAN		1	0.837733	1
O95789	ZMYM6_HUMAN			0.702112	1
O95793	STAU1_HUMAN	1		0.859692	1
O95801	CNS1_HUMAN	1		0.860634	1
O95803	NDST3_HUMAN			0.175752	0
O95807	TM50A_HUMAN			0.0735775	0
O95810	CAVN2_HUMAN	1		0.725735	1
O95813	CER1_HUMAN			0.0729951	0
O95816	BAG2_HUMAN	1		0.267831	0
O95817	BAG3_HUMAN	1		0.637693	1
O95819	M4K4_HUMAN			0.669253	1
O95822	DCMC_HUMAN			0.45584	0
O95825	QORL1_HUMAN	0		0.188952	0
O95831	AIFM1_HUMAN			0.1533	0
O95832	CLD1_HUMAN			0.063776	0
O95833	CLIC3_HUMAN			0.468094	0
O95834	EMAL2_HUMAN			0.867804	1
O95835	LATS1_HUMAN			0.80176	1
O95837	GNA14_HUMAN			0.838147	1
O95843	GUC1C_HUMAN	0		0.174841	0
O95847	UCP4_HUMAN			0.248174	0
O95848	NUD14_HUMAN			0.407075	0
O95858	TSN15_HUMAN			0.0736169	0
O95859	TSN12_HUMAN		0	0.0631661	0
O95861	BPNT1_HUMAN	0		0.165785	0
O95863	SNAI1_HUMAN			0.784478	1
O95864	FADS2_HUMAN	1		0.545048	0
O95865	DDAH2_HUMAN			0.87413	1
O95866	G6B_HUMAN			0.142038	0
O95867	LY66C_HUMAN			0.0747754	0
O95868	LY66D_HUMAN			0.0939104	0
O95870	ABHGA_HUMAN	0		0.0691046	0
O95872	GPAN1_HUMAN			0.587067	1
O95876	FRITZ_HUMAN			0.501158	0
O95881	TXD12_HUMAN	0		0.29196	0
O95886	DLGP3_HUMAN			0.169457	0
O95897	NOE2_HUMAN			0.358338	0
O95900	TRUB2_HUMAN		1	0.905464	1
O95905	ECD_HUMAN			0.60252	1
O95907	MOT3_HUMAN			0.12777	0
O95922	TTLL1_HUMAN			0.827647	1
O95925	EPPI_HUMAN			0.196277	0
O95926	SYF2_HUMAN	1		0.93335	1
O95931	CBX7_HUMAN		1	0.29191	0
O95932	TGM3L_HUMAN			0.322339	0
O95935	TBX18_HUMAN		0	0.233796	0
O95936	EOMES_HUMAN			0.327559	0
O95944	NCTR2_HUMAN			0.109683	0
O95947	TBX6_HUMAN			0.103316	0
O95948	ONEC2_HUMAN			0.117322	0
O95954	FTCD_HUMAN			0.779587	1
O95965	ITGBL_HUMAN	0		0.164315	0
O95967	FBLN4_HUMAN			0.0983397	0
O95968	SG1D1_HUMAN			0.130429	0
O95970	LGI1_HUMAN			0.284721	0
O95971	BY55_HUMAN			0.354691	0
O95972	BMP15_HUMAN			0.125115	0
O95977	S1PR4_HUMAN			0.0573815	0
O95980	RECK_HUMAN			0.0995477	0
O95983	MBD3_HUMAN			0.890917	1
O95985	TOP3B_HUMAN	1		0.909709	1
O95988	TCL1B_HUMAN			0.590055	1
O95989	NUDT3_HUMAN			0.660267	1
O95990	F107A_HUMAN			0.89828	1
O95992	CH25H_HUMAN			0.0902207	0
O95994	AGR2_HUMAN			0.152842	0
O95995	DRC4_HUMAN			0.785272	1
O95996	APCL_HUMAN			0.0998104	0
O95997	PTTG1_HUMAN			0.227315	0
O95998	I18BP_HUMAN			0.0742966	0
O95999	BCL10_HUMAN	0		0.115247	0
O96000	NDUBA_HUMAN	0		0.612678	1
O96004	HAND1_HUMAN			0.196914	0
O96005	CLPT1_HUMAN	0		0.204167	0
O96006	ZBED1_HUMAN	0		0.819494	1
O96007	MOC2B_HUMAN	0		0.399989	0
O96008	TOM40_HUMAN	0		0.0856675	0
O96009	NAPSA_HUMAN			0.0874067	0
O96011	PX11B_HUMAN	0		0.125561	0
O96013	PAK4_HUMAN	0		0.265723	0
O96014	WNT11_HUMAN			0.154366	0
O96015	DNAL4_HUMAN			0.83742	1
O96017	CHK2_HUMAN	0		0.510112	0
O96018	APBA3_HUMAN			0.601149	1
O96019	ACL6A_HUMAN		1	0.382368	0
O96020	CCNE2_HUMAN			0.641486	1
O96024	B3GT4_HUMAN			0.116217	0
O96028	NSD2_HUMAN			0.786125	1
O96033	MOC2A_HUMAN		0	0.735239	1
O97980	HMHB1_HUMAN			0.0781704	0
P00156	CYB_HUMAN			0.054382	0
P00167	CYB5_HUMAN			0.112362	0
P00325	ADH1B_HUMAN			0.193953	0
P00326	ADH1G_HUMAN			0.228734	0
P00338	LDHA_HUMAN			0.555445	0
P00352	AL1A1_HUMAN			0.555651	0
P00367	DHE3_HUMAN	1		0.861681	1
P00374	DYR_HUMAN			0.584042	1
P00387	NB5R3_HUMAN	1		0.307641	0
P00390	GSHR_HUMAN	1		0.191455	0
P00395	COX1_HUMAN			0.054053	0
P00403	COX2_HUMAN		1	0.0645195	0
P00414	COX3_HUMAN			0.055982	0
P00439	PH4H_HUMAN			0.360166	0
P00441	SODC_HUMAN	1		0.860691	1
P00450	CERU_HUMAN			0.280068	0
P00451	FA8_HUMAN			0.258328	0
P00480	OTC_HUMAN			0.415153	0
P00488	F13A_HUMAN			0.254328	0
P00491	PNPH_HUMAN	0		0.118818	0
P00492	HPRT_HUMAN			0.662595	1
P00505	AATM_HUMAN	1		0.914293	1
P00519	ABL1_HUMAN			0.150057	0
P00533	EGFR_HUMAN			0.0751206	0
P00540	MOS_HUMAN			0.154015	0
P00558	PGK1_HUMAN		1	0.604312	1
P00568	KAD1_HUMAN			0.12946	0
P00709	LALBA_HUMAN			0.096515	0
P00734	THRB_HUMAN	1		0.897564	1
P00736	C1R_HUMAN			0.766927	1
P00738	HPT_HUMAN			0.9003	1
P00739	HPTR_HUMAN			0.885831	1
P00740	FA9_HUMAN			0.865836	1
P00742	FA10_HUMAN			0.890462	1
P00746	CFAD_HUMAN			0.865767	1
P00747	PLMN_HUMAN			0.883812	1
P00748	FA12_HUMAN			0.709225	1
P00749	UROK_HUMAN			0.916184	1
P00750	TPA_HUMAN			0.832768	1
P00751	CFAB_HUMAN			0.843473	1
P00797	RENI_HUMAN	0		0.23969	0
P00813	ADA_HUMAN	0		0.412107	0
P00846	ATP6_HUMAN			0.0554163	0
P00915	CAH1_HUMAN			0.359806	0
P00918	CAH2_HUMAN	1		0.811405	1
P00966	ASSY_HUMAN	1		0.913084	1
P00973	OAS1_HUMAN			0.724446	1
P00995	ISK1_HUMAN			0.122756	0
P01008	ANT3_HUMAN			0.478101	0
P01009	A1AT_HUMAN			0.186193	0
P01011	AACT_HUMAN			0.116804	0
P01019	ANGT_HUMAN			0.0772954	0
P01023	A2MG_HUMAN			0.223877	0
P01024	CO3_HUMAN	0		0.196417	0
P01031	CO5_HUMAN			0.125757	0
P01033	TIMP1_HUMAN			0.0936942	0
P01034	CYTC_HUMAN	0		0.259077	0
P01036	CYTS_HUMAN			0.267662	0
P01037	CYTN_HUMAN			0.198565	0
P01040	CYTA_HUMAN			0.878856	1
P01042	KNG1_HUMAN			0.289606	0
P01100	FOS_HUMAN	0		0.153797	0
P01106	MYC_HUMAN			0.182057	0
P01111	RASN_HUMAN			0.870082	1
P01112	RASH_HUMAN			0.862421	1
P01116	RASK_HUMAN			0.888694	1
P01127	PDGFB_HUMAN			0.178006	0
P01130	LDLR_HUMAN			0.118207	0
P01133	EGF_HUMAN			0.183017	0
P01135	TGFA_HUMAN			0.0730529	0
P01137	TGFB1_HUMAN			0.152702	0
P01138	NGF_HUMAN			0.266046	0
P01148	GON1_HUMAN			0.0917253	0
P01160	ANF_HUMAN			0.0685172	0
P01178	NEU1_HUMAN			0.0744395	0
P01185	NEU2_HUMAN			0.114302	0
P01189	COLI_HUMAN			0.221097	0
P01210	PENK_HUMAN			0.215488	0
P01213	PDYN_HUMAN			0.0935755	0
P01215	GLHA_HUMAN			0.0790781	0
P01222	TSHB_HUMAN			0.0953277	0
P01225	FSHB_HUMAN			0.105309	0
P01229	LSHB_HUMAN			0.0632885	0
P01236	PRL_HUMAN			0.0684136	0
P01241	SOMA_HUMAN			0.0725863	0
P01242	SOM2_HUMAN			0.0879799	0
P01258	CALC_HUMAN			0.0650652	0
P01266	THYG_HUMAN			0.120022	0
P01270	PTHY_HUMAN			0.213121	0
P01275	GLUC_HUMAN			0.196307	0
P01282	VIP_HUMAN			0.0923098	0
P01286	SLIB_HUMAN		0	0.10003	0
P01298	PAHO_HUMAN			0.0596378	0
P01303	NPY_HUMAN			0.0715324	0
P01308	INS_HUMAN			0.0584238	0
P01344	IGF2_HUMAN			0.0874312	0
P01350	GAST_HUMAN			0.0675494	0
P01374	TNFB_HUMAN			0.0594955	0
P01375	TNFA_HUMAN			0.0671785	0
P01563	IFNA2_HUMAN			0.0631467	0
P01567	IFNA7_HUMAN			0.071422	0
P01568	IFN21_HUMAN			0.0694606	0
P01570	IFN14_HUMAN			0.0669971	0
P01571	IFN17_HUMAN			0.0676374	0
P01574	IFNB_HUMAN			0.079148	0
P01579	IFNG_HUMAN			0.352301	0
P01583	IL1A_HUMAN			0.59118	1
P01584	IL1B_HUMAN			0.734224	1
P01588	EPO_HUMAN			0.060886	0
P01589	IL2RA_HUMAN			0.0958607	0
P01591	IGJ_HUMAN			0.200225	0
P01593	KVD33_HUMAN			0.118938	0
P01594	KV133_HUMAN			0.118938	0
P01597	KV139_HUMAN			0.107323	0
P01602	KV105_HUMAN			0.114182	0
P01615	KVD28_HUMAN			0.0946563	0
P01619	KV320_HUMAN			0.0917449	0
P01699	LV144_HUMAN			0.105586	0
P01700	LV147_HUMAN			0.103988	0
P01701	LV151_HUMAN			0.119979	0
P01704	LV214_HUMAN			0.140954	0
P01705	LV223_HUMAN			0.126204	0
P01706	LV211_HUMAN			0.136583	0
P01709	LV208_HUMAN			0.177009	0
P01721	LV657_HUMAN			0.102585	0
P01730	CD4_HUMAN			0.508262	0
P01732	CD8A_HUMAN			0.0786049	0
P01742	HV169_HUMAN			0.311897	0
P01764	HV323_HUMAN			0.244659	0
P01768	HV330_HUMAN			0.28402	0
P01772	HV333_HUMAN			0.322927	0
P01780	HV307_HUMAN			0.216269	0
P01814	HV270_HUMAN			0.0964052	0
P01817	HV205_HUMAN			0.125476	0
P01825	HV459_HUMAN			0.191786	0
P01833	PIGR_HUMAN			0.567592	1
P01834	IGKC_HUMAN			0.286317	0
P01848	TRAC_HUMAN			0.0795857	0
P01850	TRBC1_HUMAN			0.208863	0
P01854	IGHE_HUMAN			0.171424	0
P01857	IGHG1_HUMAN			0.241066	0
P01859	IGHG2_HUMAN			0.217234	0
P01860	IGHG3_HUMAN			0.156845	0
P01861	IGHG4_HUMAN			0.20357	0
P01871	IGHM_HUMAN			0.569073	1
P01876	IGHA1_HUMAN			0.128435	0
P01877	IGHA2_HUMAN			0.116308	0
P01880	IGHD_HUMAN			0.238567	0
P01889	HLAB_HUMAN			0.587969	1
P01893	HLAH_HUMAN			0.702808	1
P01903	DRA_HUMAN			0.190952	0
P01906	DQA2_HUMAN			0.121068	0
P01909	DQA1_HUMAN			0.143028	0
P01911	DRB1_HUMAN			0.462144	0
P01920	DQB1_HUMAN			0.405096	0
P02008	HBAZ_HUMAN			0.144938	0
P02042	HBD_HUMAN			0.600144	1
P02100	HBE_HUMAN			0.23405	0
P02144	MYG_HUMAN			0.855403	1
P02452	CO1A1_HUMAN			0.341303	0
P02458	CO2A1_HUMAN			0.409227	0
P02461	CO3A1_HUMAN			0.290271	0
P02462	CO4A1_HUMAN			0.278593	0
P02489	CRYAA_HUMAN			0.91848	1
P02511	CRYAB_HUMAN	1		0.895274	1
P02533	K1C14_HUMAN			0.798724	1
P02538	K2C6A_HUMAN			0.851686	1
P02545	LMNA_HUMAN	1		0.754445	1
P02549	SPTA1_HUMAN			0.735432	1
P02585	TNNC2_HUMAN			0.115042	0
P02647	APOA1_HUMAN			0.150145	0
P02649	APOE_HUMAN			0.232472	0
P02652	APOA2_HUMAN			0.0715102	0
P02654	APOC1_HUMAN			0.0776833	0
P02655	APOC2_HUMAN			0.0625151	0
P02656	APOC3_HUMAN			0.0683414	0
P02671	FIBA_HUMAN			0.263243	0
P02675	FIBB_HUMAN			0.121092	0
P02679	FIBG_HUMAN			0.150878	0
P02686	MBP_HUMAN			0.901162	1
P02689	MYP2_HUMAN			0.922793	1
P02708	ACHA_HUMAN			0.0648051	0
P02724	GLPA_HUMAN			0.0707031	0
P02730	B3AT_HUMAN			0.0722052	0
P02741	CRP_HUMAN			0.101129	0
P02743	SAMP_HUMAN			0.104917	0
P02745	C1QA_HUMAN			0.191757	0
P02746	C1QB_HUMAN			0.262412	0
P02747	C1QC_HUMAN			0.136591	0
P02748	CO9_HUMAN			0.32313	0
[truncated: 18,407 more rows]
